# Supplementary material for: An expeditive and green chemo-enzymatic route to diester sinapoyl-l-malate analogues: sustainable bioinspired and biosourced UV filters and molecular heaters
Source: Royal Society of Chemistry journal article supplement (doi:10.1039/d3sc04836e), 2023-01-01
Supplement: d3sc04836e1.pdf [file d3sc04836e1.pdf]

**An Expeditive and Green Chemo-Enzymatic Route To Diester Sinapoyl-L-Malate Analogues:  
Sustainable Bioinspired And Biosourced UV Filters and Molecular Heaters**

Benjamin Rioux,<sup>§a</sup> Louis M. M. Mouterde,<sup>§a</sup> Jimmy Alarcán,<sup>§b</sup> Temitope T. Abiola,<sup>§c,d</sup> Matthias J.A. Vink,<sup>§e</sup> Jack M. Woolley,<sup>§c</sup> Aurélien A. M. Peru,<sup>a</sup> Matthieu M. Mention,<sup>a</sup> Fanny Brunissen,<sup>a</sup> Giel Berden,<sup>e</sup> Jos Oomens,<sup>e\*</sup> Albert Braeuning,<sup>b\*</sup> Vasilios G. Stavros,<sup>c,f\*</sup> and Florent Allais<sup>a\*</sup>

<sup>a</sup> URD Agro-Biotechnologies Industrielles (ABI), CEBB, AgroParisTech, 51110, Pomacle, France.

Email: [florent.allais@agroparistech.fr](mailto:florent.allais@agroparistech.fr)

<sup>b</sup> Department of Food Safety, German Federal Institute for Risk Assessment, Max-Dohrn-Str. 8-10, 10589, Berlin, Germany.

Email: [albert.braeuning@bfr.bund.de](mailto:albert.braeuning@bfr.bund.de)

<sup>c</sup> Department of Chemistry, University of Warwick, Gibbet Hill Road, CV4 7AL, Coventry, United-Kingdom.

Email: [v.stavros@warwick.ac.uk](mailto:v.stavros@warwick.ac.uk)

<sup>d</sup> Department of Chemistry, Lash Miller Chemical Laboratories, 80 St. George Street, Toronto, ON, M5S 3H6.

<sup>e</sup> Radboud University, Institute for Molecules and Materials, FELIX Laboratory, Toernooiveld 7, 6525ED, Nijmegen, the Netherlands

Email: [j.oomens@science.ru.nl](mailto:j.oomens@science.ru.nl)

<sup>f</sup> School of Chemistry, University of Birmingham, Edgbaston, Birmingham B15 2TT, UK

Email: [v.stavros@bham.ac.uk](mailto:v.stavros@bham.ac.uk)

<sup>§</sup> these authors contributed equally to this work

## Electronic Supporting Information

## Table of ContentsS

|                                                                              |     |
|------------------------------------------------------------------------------|-----|
| General Characterization data.....                                           | S5  |
| Diethyl sinapoyl-L-malate.....                                               | S5  |
| Dibutyl sinapoyl-L-malate.....                                               | S5  |
| Dioctyl sinapoyl-L-malate.....                                               | S5  |
| Dilauryl sinapoyl-L-malate.....                                              | S5  |
| Dicitronellyl sinapoyl-L-malate.....                                         | S5  |
| Digeranyl sinapoyl-L-malate.....                                             | S6  |
| Difarnesyl sinapoyl-L-malate.....                                            | S6  |
| Dioleylyl sinapoyl-L-malate.....                                             | S6  |
| NMR spectra of diester sinapoyl-L-malate series.....                         | S8  |
| Figure S1: <sup>1</sup> H spectrum of diethyl sinapoyl-L-malate.....         | S8  |
| Figure S2: <sup>13</sup> C spectrum of diethyl sinapoyl-L-malate.....        | S8  |
| Figure S3: <sup>1</sup> H spectrum of dibutyl sinapoyl-L-malate.....         | S9  |
| Figure S4: <sup>13</sup> C spectrum of dibutyl sinapoyl-L-malate.....        | S9  |
| Figure S5: <sup>1</sup> H spectrum of dioctyl sinapoyl-L-malate.....         | S10 |
| Figure S6: <sup>13</sup> C spectrum of dioctyl sinapoyl-L-malate.....        | S10 |
| Figure S7: <sup>1</sup> H spectrum of dilauryl sinapoyl-L-malate.....        | S11 |
| Figure S8: <sup>13</sup> C spectrum of dilauryl sinapoyl-L-malate.....       | S11 |
| Figure S9: <sup>1</sup> H spectrum of dicitronellyl sinapoyl-L-malate.....   | S12 |
| Figure S10: <sup>13</sup> C spectrum of dicitronellyl sinapoyl-L-malate..... | S12 |
| Figure S 11: <sup>1</sup> H spectrum of digeranyl sinapoyl-L-malate.....     | S13 |
| Figure S12: <sup>13</sup> C spectrum of digeranyl sinapoyl-L-malate.....     | S13 |
| Figure S13: <sup>1</sup> H spectrum of difarnesyl sinapoyl-L-malate.....     | S14 |
| Figure S14: <sup>13</sup> C spectrum of difarnesyl sinapoyl-L-malate.....    | S14 |
| Figure S 15: <sup>1</sup> H spectrum of dioleylyl sinapoyl-L-malate.....     | S15 |
| Figure S16: <sup>13</sup> C spectrum of dioleylyl sinapoyl-L-malate.....     | S15 |
| HRMS spectra of diester sinapoyl-L-malate.....                               | S16 |
| Figure S17: HRMS spectrum of diethyl sinapoyl-L-malate.....                  | S16 |
| Figure S18: HRMS spectrum of dibutyl sinapoyl-L-malate.....                  | S16 |
| Figure S19: HRMS spectrum of dioctyl sinapoyl-L-malate.....                  | S17 |
| Figure S20: HRMS spectrum of dilauryl sinapoyl-L-malate.....                 | S17 |
| Figure S21: HRMS spectrum of dicitronellyl sinapoyl-L-malate.....            | S18 |
| Figure S22: HRMS spectrum of digeranyl sinapoyl-L-malate.....                | S18 |
| Figure S23: HRMS spectrum of difarnesyl sinapoyl-L-malate.....               | S19 |
| Figure S24: HRMS spectrum of dioleylyl sinapoyl-L-malate.....                | S19 |

|                                                                                                                  |     |
|------------------------------------------------------------------------------------------------------------------|-----|
| UV-Photostability spectra of diester sinapoyl-L-malate .....                                                     | S20 |
| Figure S25: UV Photostability of diethyl sinapoyl-L-malate.....                                                  | S20 |
| Figure S26: UV Photostability of dibutyl sinapoyl-L-malate. ....                                                 | S20 |
| Figure S27: UV Photostability of dioctyl sinapoyl-L-malate.....                                                  | S20 |
| Figure S28: UV Photostability of dilauryl sinapoyl-L-malate.....                                                 | S20 |
| Figure S29: UV Photostability of dicitronellyl sinapoyl-L-malate.....                                            | S21 |
| Figure S30: UV Photostability of digeranyl sinapoyl-L-malate.....                                                | S21 |
| Figure S31: UV Photostability of difarnesyl sinapoyl-L-malate.....                                               | S21 |
| Figure S32: UV Photostability of dioleylyl sinapoyl-L-malate. ....                                               | S21 |
| Antiradical activities .....                                                                                     | S22 |
| Figure S33: Antiradical activity of sinapoyl-L-malate.....                                                       | S22 |
| Figure S34: Antiradical activity of diethyl sinapoyl-L-malate.....                                               | S22 |
| Figure S35: Antiradical activity of dibutyl sinapoyl-L-malate.....                                               | S22 |
| Figure S36: Antiradical activity dioctyl sinapoyl-L-malate. ....                                                 | S23 |
| Figure S37: Antiradical activity of dilauryl sinapoyl-L-malate.....                                              | S23 |
| Figure S38: Antiradical activity of dicitronellyl sinapoyl-L-malate.....                                         | S23 |
| Figure S39: Antiradical activity of digeranyl sinapoyl-L-malate.....                                             | S24 |
| Figure S40: Antiradical activity of difarnesyl sinapoyl-L-malate.....                                            | S24 |
| Figure S41: Antiradical activity of dioleylyl sinapoyl-L-malate. ....                                            | S24 |
| Figure S42: Antiradical activity of butylated hydroxytoluene. ....                                               | S25 |
| Figure S43: Antiradical activity of butylated hydroxyanisole. ....                                               | S25 |
| Simulated Solar irradiation experiments .....                                                                    | S26 |
| Figure S44: Measured ABET Technologies Sun 2000 solar simulator lamp spectrum.....                               | S26 |
| Infrared Ion Spectroscopy vibrational analysis of DOSM .....                                                     | S26 |
| Figure S45: 3D computed structure of DG2HS depicting hydrogen bonding between the two<br>carboxyl groups. ....   | S27 |
| Infrared Ion Spectroscopy vibrational analysis of DGSM .....                                                     | S27 |
| Toxicology.....                                                                                                  | S28 |
| Table S1. Translation of the VEGA, TEST and LAZAR predictions into a mutagenicity/carcinogenicity<br>score. .... | S28 |
| Table S2. Translation of the VEGA predictions into a persistence score. ....                                     | S28 |
| Table S3. Translation of the ISIDA predictions into a persistence score.....                                     | S28 |
| Table S4. Predictions on the endocrine toxicity using VEGA platform. ....                                        | S28 |
| Table S5. Predicted oral LD <sub>50</sub> and NOAEL in rats. ....                                                | S29 |
| Table S6: Predictions on the bioaccumulation property using VEGA and ISIDA Predictor platforms.<br>.....         | S30 |

|                                                                                                                                                                                                                                                                                                                              |     |
|------------------------------------------------------------------------------------------------------------------------------------------------------------------------------------------------------------------------------------------------------------------------------------------------------------------------------|-----|
| Table S7. Predictions on the biodegradability property using VEGA and ISIDA Predictor platforms.<br>.....                                                                                                                                                                                                                    | S31 |
| 2 ns transient spectral of Sinapoyl-L-Malate and its derivatives.....                                                                                                                                                                                                                                                        | S31 |
| Figure S46: 2 ns transient data obtained in caprylic capric triglyceride for (A) SM, (B) DESM, (C) DBSM (D) DOSM, (E) DLSM, (F) DCSM, (G) DGSM, (H) DFSM, and (I) DOleySM .....                                                                                                                                              | S31 |
| Evolution associated difference spectra (EADS) obtained from the global fitting of transient data for sinapoyl-L-malate and its derivatives .....                                                                                                                                                                            | S32 |
| Figure S47: EADS extracted from the sequential global fitting of the transient spectra for (A) SM, (B) DESM, (C) DBSM (D) DOSM, (E) DLSM, (F) DCSM, (G) DGSM, (H) DFSM, and (I) DOleySM. In panel (A) EADS1 have been omitted due to the large error associated with it.....                                                 | S32 |
| Residuals from the global fitting of transient data for sinapoyl-L-malate and its derivatives.....                                                                                                                                                                                                                           | S33 |
| Figure S48: False colour heatmap for the residuals obtained from the sequential global fitting of the transient spectra for (A) SM, (B) DESM, (C) DBSM (D) DOSM, (E) DLSM, (F) DCSM, (G) DGSM, (H) DFSM, and (I) DOleySM.....                                                                                                | S33 |
| Solvent alone instrument response.....                                                                                                                                                                                                                                                                                       | S34 |
| Figure S49: (A) False colour heatmap for CCT solvent only response. (B) Selected transients for solvent-only time-zero response at a probe wavelength of 360 nm with extracted full-width half maxima (FWHM) of 120 fs. This value is used as the instrument response in the global fit analysis of all the TEA spectra..... | S34 |
| Reference .....                                                                                                                                                                                                                                                                                                              | S35 |

## General Characterization data

### Diethyl sinapoyl-L-malate

Pale yellow oil (83%); **UV**:  $\lambda_{\max}$  (EtOH, nm) 334,  $\epsilon$  (L.mol<sup>-1</sup>.cm<sup>-1</sup>) 20482.  $[\alpha]_D^{25}$ : +11 (C (g.mL<sup>-1</sup>) 0.02, MeOH, 25.2 °C). **<sup>1</sup>H NMR** (300 MHz, 25 °C, acetone-d<sub>6</sub>)  $\delta$ : 7.84 (1H, s, H-9), 7.64 (1H, d,  $J$  = 15.9 Hz, H-3), 7.06 (2H, s, H-5), 6.47 (1H, d,  $J$  = 15.8 Hz, H-2), 5.50 (1H, dd,  $J$  = 4.7 and 8.0 Hz, H-11), 4.17 (4H, m, H-13 and H-13'), 3.90 (6H, s, H-8), 2.95 (2H, m, H-12), 1.24 (6H, t,  $J$  = 7.1 Hz, H-15 and H-15'). **<sup>13</sup>C NMR** (75 MHz, 25 °C, acetone-d<sub>6</sub>)  $\delta$ : 169.8 (C-10), 169.6 (C-13), 166.6 (C-1), 148.9 (C-6), 147.5 (C-3), 139.8 (C-7), 125.9 (C-4), 114.8 (C-2), 107.0 (C-5), 69.2 (C-11), 62.0 and 61.4 (C-14 and C-14'), 56.7 (C-8), 36.9 (C-12), 14.4 (C-15 and C-15'). **TOF MS ES+**: [M+H]<sup>+</sup> for C<sub>19</sub>H<sub>25</sub>O<sub>9</sub>:  $m/z$  397.1499; found:  $m/z$  397.1498.

### Dibutyl sinapoyl-L-malate

Pale yellow oil (83%); **UV**:  $\lambda_{\max}$  (EtOH, nm) 334,  $\epsilon$  (L.mol<sup>-1</sup>.cm<sup>-1</sup>) 22063.  $[\alpha]_D^{25}$ : +11 (C (g.mL<sup>-1</sup>) 0.02, MeOH, 25.0 °C). **<sup>1</sup>H NMR** (300 MHz, 25 °C, acetone-d<sub>6</sub>)  $\delta$ : 7.64 (1H, d,  $J$  = 15.8 Hz, H-3), 7.06 (2H, s, H-5), 6.47 (1H, d,  $J$  = 15.9 Hz, H-2), 5.52 (1H, dd,  $J$  = 4.7 and 8.0 Hz, H-11), 4.14 (4H, m, H-14 and H-14'), 3.90 (6H, s, H-8), 2.96 (2H, ABX system,  $J_{AX}$  = 4.7 Hz,  $J_{BX}$  = 8.0 Hz, H-12), 1.61 (4H, m, H-15 and H-15'), 1.39 (4H, hex,  $J$  = 7.6 Hz, H-16 and H-16'), 0.91 (6H, t,  $J$  = 7.3 Hz, H-17 and H-17'). **<sup>13</sup>C NMR** (75 MHz, 25 °C, acetone-d<sub>6</sub>)  $\delta$ : 169.8 (C-10), 169.6 (C-13), 166.5 (C-1), 148.9 (C-6), 147.5 (C-3), 139.8 (C-7), 125.9 (C-4), 114.8 (C-2), 107.0 (C-5), 69.3 (C-11), 65.8 and 65.2 (C-14 and C-14'), 56.7 (C-8), 36.9 (C-12), 31.4 and 31.3 (C-15 and C-15'), 19.7 and 19.7 (C-16 and C-16'), 14.0 and 13.9 (C-17 and C-17'). **TOF MS ES+**: [M+H]<sup>+</sup> for C<sub>23</sub>H<sub>33</sub>O<sub>9</sub>:  $m/z$  453.2125; found:  $m/z$  453.2120.

### Diocetyl sinapoyl-L-malate

Pale yellow oil (95%); **UV**:  $\lambda_{\max}$  (EtOH, nm) 336,  $\epsilon$  (L.mol<sup>-1</sup>.cm<sup>-1</sup>) 20765.  $[\alpha]_D^{25}$ : +10 (C (g.mL<sup>-1</sup>) 0.02, MeOH, 24.9 °C). **<sup>1</sup>H NMR** (300 MHz, 25 °C, DMSO-d<sub>6</sub>)  $\delta$ : 9.04 (1H, s, H-9), 7.59 (1H, d,  $J$  = 15.8 Hz, H-3), 7.05 (2H, s, H-5), 6.59 (1H, d,  $J$  = 15.8 Hz, H-2), 5.43 (1H, dd,  $J$  = 4.9 and 7.4 Hz, H-11), 4.08 (4H, m, H-14 and H-14'), 3.80 (6H, s, H-8), 2.96 (2H, m, H-12), 1.55 (4H, m, H-15 and H-15'), 1.20 (20H, m, H-16 to H-20 and H-16' to H-20'), 0.81 (6H, t,  $J$  = 7.3 Hz, H-21 and H-21'). **<sup>13</sup>C NMR** (75 MHz, 25 °C, DMSO-d<sub>6</sub>)  $\delta$ : 169.0 (C-10), 168.7 (C-13), 165.7 (C-1), 148.0 (C-6), 146.9 (C-3), 138.7 (C-7), 124.1 (C-4), 113.5 (C-2), 106.4 (C-5), 68.1 (C-11), 65.2 and 64.6 (C-14 and C-14'), 56.1 (C-8), 35.9 (C-12), 31.3 – 22.1 (C-16 to C-20 and C-16' to C-20'), 28.1 and 28.0 (C-15 and C-15'), 13.9 (C-21 and C-21'). **TOF MS ES+**: [M+H]<sup>+</sup> for C<sub>31</sub>H<sub>49</sub>O<sub>9</sub>:  $m/z$  565.3377; found:  $m/z$  565.3377.

### Dilauryl sinapoyl-L-malate

Pale yellow oil (99%); **UV**:  $\lambda_{\max}$  (EtOH, nm) 335,  $\epsilon$  (L.mol<sup>-1</sup>.cm<sup>-1</sup>) 22184.  $[\alpha]_D^{25}$ : +9.5 (C (g.mL<sup>-1</sup>) 0.02, MeOH, 25.0 °C). **<sup>1</sup>H NMR** (300 MHz, 25 °C, acetone-d<sub>6</sub>)  $\delta$ : 7.64 (1H, d,  $J$  = 15.9 Hz, H-3), 7.06 (2H, s, H-5), 6.48 (1H, d,  $J$  = 15.9 Hz, H-2), 5.52 (1H, dd,  $J$  = 4.7 and 7.9 Hz, H-11), 4.14 (4H, m, H-14 and H-14'), 3.90 (6H, s, H-8), 2.97 (2H, ABX system,  $J_{AX}$  = 4.7 Hz,  $J_{BX}$  = 8.0 Hz, H-12), 1.64 (4H, m, H-15 and H-15'), 1.27 (36H, m, H-16 to H-24 and H-16' to H-24'), 0.87 (6H, t,  $J$  = 7.3 Hz, H-25 and H-25'). **<sup>13</sup>C NMR** (75 MHz, 25 °C, DMSO-d<sub>6</sub>)  $\delta$ : 168.9 (C-10), 168.6 (C-13), 165.7 (C-1), 148.0 (C-6), 146.9 (C-3), 138.8 (C-7), 124.1 (C-4), 113.4 (C-2), 106.4 (C-5), 68.1 (C-11), 65.1 and 64.5 (C-14 and C-14'), 56.1 (C-8), 35.9 (C-12), 31.3 (C-23 and C-23'), 29.1 – 28.7 (C-17 to C-22 and C-17' to C-22'), 28.1 and 28.0 (C-15 and C-15'), 25.4 and 25.3 (C-16 and C-16'), 22.1 (C-24 and C-24'), 13.9 (C-25 and C-25'). **TOF MS ES+**: [M+H]<sup>+</sup> for C<sub>39</sub>H<sub>65</sub>O<sub>9</sub>:  $m/z$  677.4629; found:  $m/z$  677.4630.

### Dicitronellyl sinapoyl-L-malate

Pale yellow oil (97%); **UV**:  $\lambda_{\max}$  (EtOH, nm) 336,  $\epsilon$  (L.mol<sup>-1</sup>.cm<sup>-1</sup>) 19776.  $[\alpha]_D^{25}$ : +3.5 (C (g.mL<sup>-1</sup>) 0.02, MeOH, 25.4 °C). **<sup>1</sup>H NMR** (300 MHz, 25 °C, CDCl<sub>3</sub>)  $\delta$ : 7.64 (1H, d,  $J$  = 15.9 Hz, H-3), 6.77 (2H, s, H-5), 6.36

(1H, d,  $J = 15.8$  Hz, H-2), 5.80 (1H, s, H-9), 5.59 (1H, t,  $J = 6.1$  Hz, H-11), 5.06 (2H, m, H-19 and H-19'), 4.19 (4H, m, H-14 and H-14'), 3.91 (6H, s, H-8), 2.94 (2H, d,  $J = 6.2$  Hz, H-12), 1.95 (4H, hept,  $J = 7.9$  Hz, H-18 and H-18'), 1.66 and 1.57 (12H, 2 s, H-21 and H-21', and H-22 and H-22'), 1.54 – 1.10 (10H, m, H-15 to H-17 and H-15' to H-17'), 0.90 and 0.88 (6H, 2 s, H-23 and H-23').  **$^{13}\text{C}$  NMR** (75 MHz, 25 °C,  $\text{CDCl}_3$ )  $\delta$ : 169.5 (C-10), 169.3 (C-13), 166.0 (C-1), 148.0 (C-6), 146.7 (C-3), 137.4 (C-7), 131.6 (C-20 and C-20'), 125.8 (C-4), 124.6 (C-19 and C-19'), 114.6 (C-2), 105.3 (C-5), 68.5 (C-11), 64.5 and 63.9 (C-14 and C-14'), 56.4 (C-8), 37.1 and 37.0 (C-17 and C-17'), 36.6 (C-12), 35.4 and 35.4 (C-15 and C-15'), 29.5 (C-16 and C-16'), 25.8 (C-21 and C-21'), 25.5 and 25.5 (C-18 and C-18'), 19.5 and 19.4 (C-23 and C-23'), 17.8 (C-22 and C-22'). **TOF MS ES+**:  $[\text{M}+\text{H}]^+$  for  $\text{C}_{35}\text{H}_{53}\text{O}_9$ :  $m/z$  617.3690; found:  $m/z$  617.3692.

#### Digeranyl sinapoyl-L-malate

Pale yellow oil (91%); **UV**:  $\lambda_{\text{max}}$  (EtOH, nm) 335,  $\epsilon$  ( $\text{L}\cdot\text{mol}^{-1}\cdot\text{cm}^{-1}$ ) 20555.  $[\alpha]_{\text{D}}^{25}$ : +4 (C ( $\text{g}\cdot\text{mL}^{-1}$ ) 0.02, MeOH, 25.5 °C).  **$^1\text{H}$  NMR** (300 MHz, 25 °C,  $\text{DMSO}-d_6$ )  $\delta$ : 7.59 (1H, d,  $J = 15.8$  Hz, H-3), 7.05 (2H, s, H-5), 6.58 (1H, d,  $J = 15.8$  Hz, H-2), 5.42 (1H, m, H-11), 5.27 (2H, t,  $J = 7.1$  Hz, H-15 and H-15'), 5.02 (2H, m, H-19 and H-19'), 4.60 (4H, m, H-14 and H-14'), 3.79 (6H, s, H-8), 2.94 (2H, ABX system,  $J_{\text{AX}} = 5.0$  Hz,  $J_{\text{BX}} = 7.5$  Hz, H-12), 2.00 (8H, m, H-17, H-18, H-17' and H-18'), 1.64 to 1.57 (12H, m, H-21, H-22, H-21' and H-22'), 1.54 and 1.52 (6H, 2s, H-23 and H-23').  **$^{13}\text{C}$  NMR** (75 MHz, 25 °C,  $\text{CDCl}_3$ )  $\delta$ : 169.0 (C-10), 168.6 (C-13), 165.7 (C-1), 148.1 (C-6), 147.0 (C-3), 142.3 and 141.9 (C-16 and C-16'), 138.7 (C-7), 131.2 and 131.1 (C-20 and C-20'), 124.2 (C-4), 124.0 (C-19 and C-19'), 118.1 and 117.8 (C-15 and C-15'), 113.5 (C-2), 106.5 (C-5), 68.1 (C-11), 61.9 and 61.3 (C-14 and C-14'), 56.1 (C-8), 38.7 (C-17 and C-17'), 35.9 (C-12), 25.8 and 25.8 (C-18 and C-18'), 25.5 (C-21 and C-21'), 17.6 and 17.5 (C-22 and C-22'), 16.2 (C-23 and C-23'). **TOF MS ES+**:  $[\text{M}+\text{H}]^+$  for  $\text{C}_{35}\text{H}_{49}\text{O}_9$ :  $m/z$  613.3377; found:  $m/z$  613.3377.

#### Difarnesyl sinapoyl-L-malate

Pale yellow oil (94%); **UV**:  $\lambda_{\text{max}}$  (EtOH, nm) 336,  $\epsilon$  ( $\text{L}\cdot\text{mol}^{-1}\cdot\text{cm}^{-1}$ ) 21254.  $[\alpha]_{\text{D}}^{25}$ : +2 (C ( $\text{g}\cdot\text{mL}^{-1}$ ) 0.02, MeOH, 24.9 °C).  **$^1\text{H}$  NMR** (300 MHz, 25 °C,  $\text{CDCl}_3$ )  $\delta$ : 7.64 (1H, d,  $J = 15.9$  Hz, H-3), 6.77 (2H, s, H-5), 6.36 (1H, d,  $J = 15.8$  Hz, H-2), 5.79 (1H, s, H-9), 5.61 (1H, t,  $J = 6.2$  Hz, H-11), 5.33 (2H, m, H-15 and 15'), 5.08 (4H, m, H-19, H-23, H-19' and H-23'), 4.67 (4H, m, H-14 and H-14'), 3.91 (6H, s, H-8), 2.95 (2H, d,  $J = 6.2$  Hz, H-12), 2.13-1.95 (16H, m, H-17, H-18, H-21, H-22, H-17', H-18', H-21', and H-22'), 1.69 and 1.59 (24H, 3 s, H-25, H-26, H-27, H-28, H-25', H-26', H-27' and H-28').  **$^{13}\text{C}$  NMR** (75 MHz, 25 °C,  $\text{CDCl}_3$ )  $\delta$ : 169.4 (C-10), 169.2 (C-13), 166.0 (C-1), 147.3 (C-6), 146.6 (C-3), 143.4 143.3 143.0 143.0 (C-16 and C-16' \*mixture of isomers\*), 137.5 (C-7), 135.8 135.8 135.7 and 135.6 (C-20 and C-20' \*mixture of isomers\*), 131.7 and 131.5 (C-24 and C-24'), 125.9 (C-4), 124.4 (C-23 and C-23'), 123.7 and 123.6 (C-15 and C-15'), 117.9 and 117.7 (C-19 and C-19'), 114.7 (C-2), 106.4 (C-5), 68.5 (C-11), 62.3 and 62.1 (C-14 and C-14'), 56.4 (C-8), 40.0 39.8 39.7 and 37.0 (C-17 and C-17' \*mixture of isomers\*), 36.6 (C-12), 26.8 26.7 26.4 and 26.2 (C-18, C-21, C-22, C-18', C-21' and C-22'), 25.8 and 23.5 (C-28 and C-28'), 17.8 16.6 and 16.1 (C-25, C-26, C-27, C-25', C-26' and C-27'). **TOF MS ES+**:  $[\text{M}+\text{H}]^+$  for  $\text{C}_{45}\text{H}_{65}\text{O}_9$ :  $m/z$  749.4629; found:  $m/z$  749.4629.

#### Diolelyl sinapoyl-L-malate

Pale yellow oil (88%); **UV**:  $\lambda_{\text{max}}$  (EtOH, nm) 336,  $\epsilon$  ( $\text{L}\cdot\text{mol}^{-1}\cdot\text{cm}^{-1}$ ) 19091.  $[\alpha]_{\text{D}}^{25}$ : +4 (C ( $\text{g}\cdot\text{mL}^{-1}$ ) 0.02, EtOH, 24.7 °C).  **$^1\text{H}$  NMR** (300 MHz, 25 °C,  $\text{CDCl}_3$ )  $\delta$ : 7.65 (1H, d,  $J = 15.9$  Hz, H-3), 6.77 (2H, s, H-5), 6.36 (1H, d,  $J = 15.9$  Hz, H-2), 5.79 (1H, s, H-9), 5.60 (1H, t,  $J = 6.1$  Hz, H-11), 5.33 (4H, m, H-22, H-23, H-22' and H-23'), 4.14 (4H, m, H-14 and H-14'), 3.92 (6H, s, H-8), 2.95 (2H, m, H-12), 2.00 (8H, m, H-21, H-24, H-21' and H-24'), 1.63 (4H, m, H-15 and H-15'), 1.38 – 1.19 (44H, m, H-16 to H-20, H-25 to H-30, H-16' to H-20' and H-25' to H-30'), 0.87 (6H, t,  $J = 6.5$  Hz, H-31 and H-31').  **$^{13}\text{C}$  NMR** (75 MHz, 25 °C,  $\text{CDCl}_3$ )  $\delta$ : 169.5 (C-10), 169.3 (C-13), 166.0 (C-1), 147.3 (C-6), 146.7 (C-3), 137.5 (C-7), 130.1 and 129.9 (C-22, C-23, C-22' and C-23'), 125.8 (C-4), 114.7 (C-2), 105.3 (C-5), 68.5 (C-11), 66.1 and 65.5 (C-14 and C-14'), 56.4

(C-8), 36.6 (C-12), 32.0 (C-29 and C-29'), 29.9 – 29.3 (C-17 to C-20, C-25 to C-28, C-17' to C-20' and C-25' to C-28'), 28.7 and 28.6 (C-15 and C-15'), 27.3 and 27.3 (C-21, C-24, C-21' and C-24'), 26.0 and 25.9 (C-16 and C-16'), 22.8 (C-30 and C-30'), 14.3 (C-31 and C-31'). **TOF MS ES+**: [M+H]<sup>+</sup> for C<sub>51</sub>H<sub>85</sub>O<sub>9</sub>: *m/z* 841.6194; found: *m/z* 841.6197.

## NMR spectra of diester sinapoyl-L-malate series

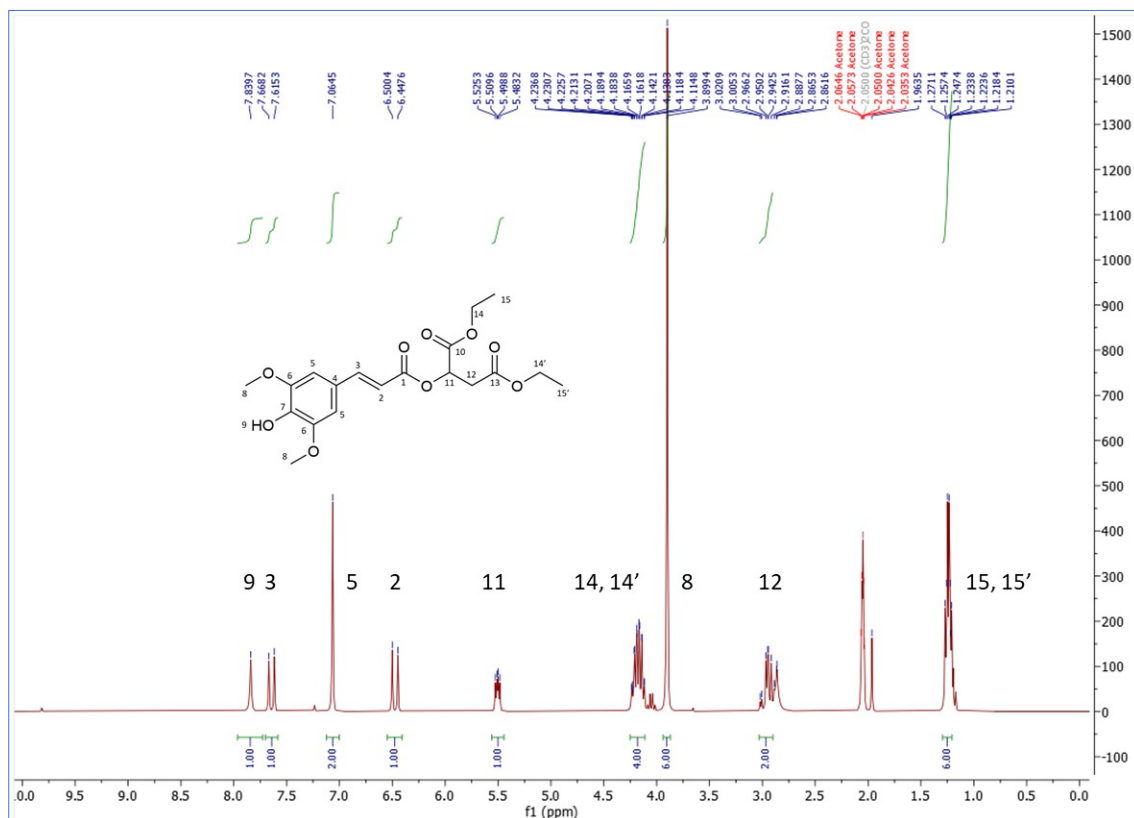

Figure S1:  $^1\text{H}$  spectrum of diethyl sinapoyl-L-malate.

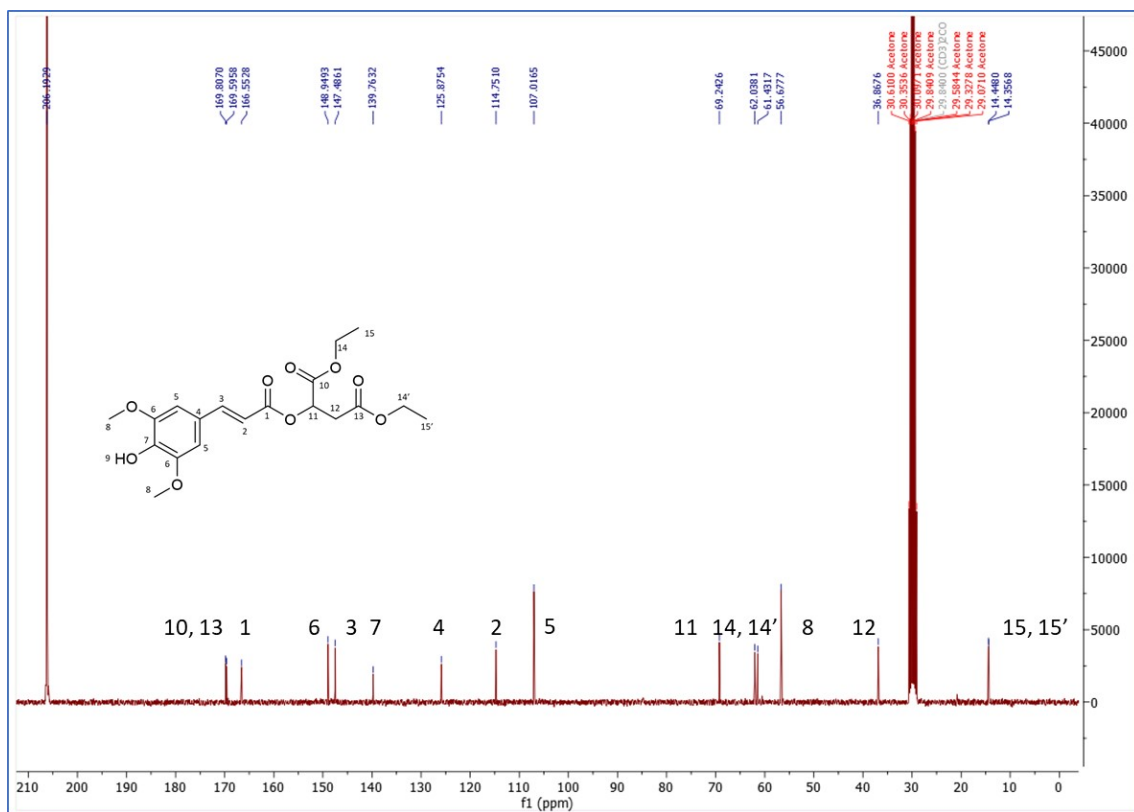

Figure S2:  $^{13}\text{C}$  spectrum of diethyl sinapoyl-L-malate.



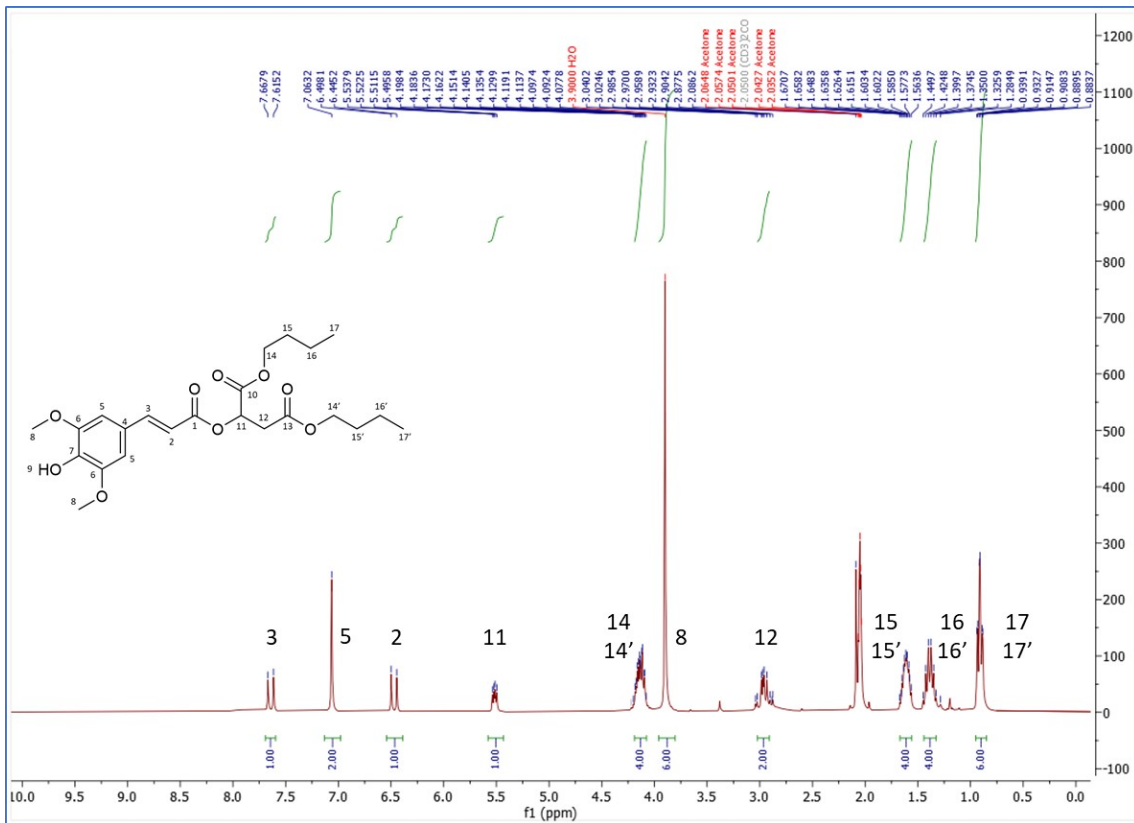

Figure S3: <sup>1</sup>H spectrum of dibutyl sinapoyl-L-malate.

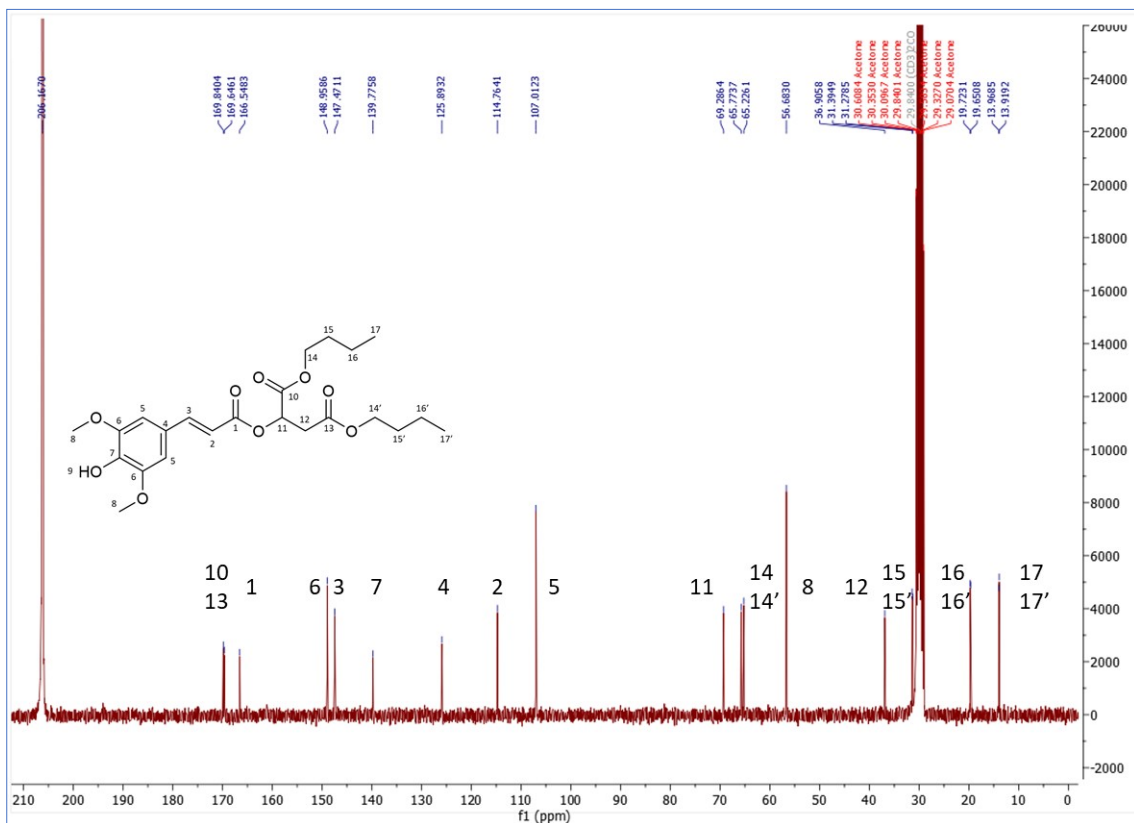

Figure S4: <sup>13</sup>C spectrum of dibutyl sinapoyl-L-malate.

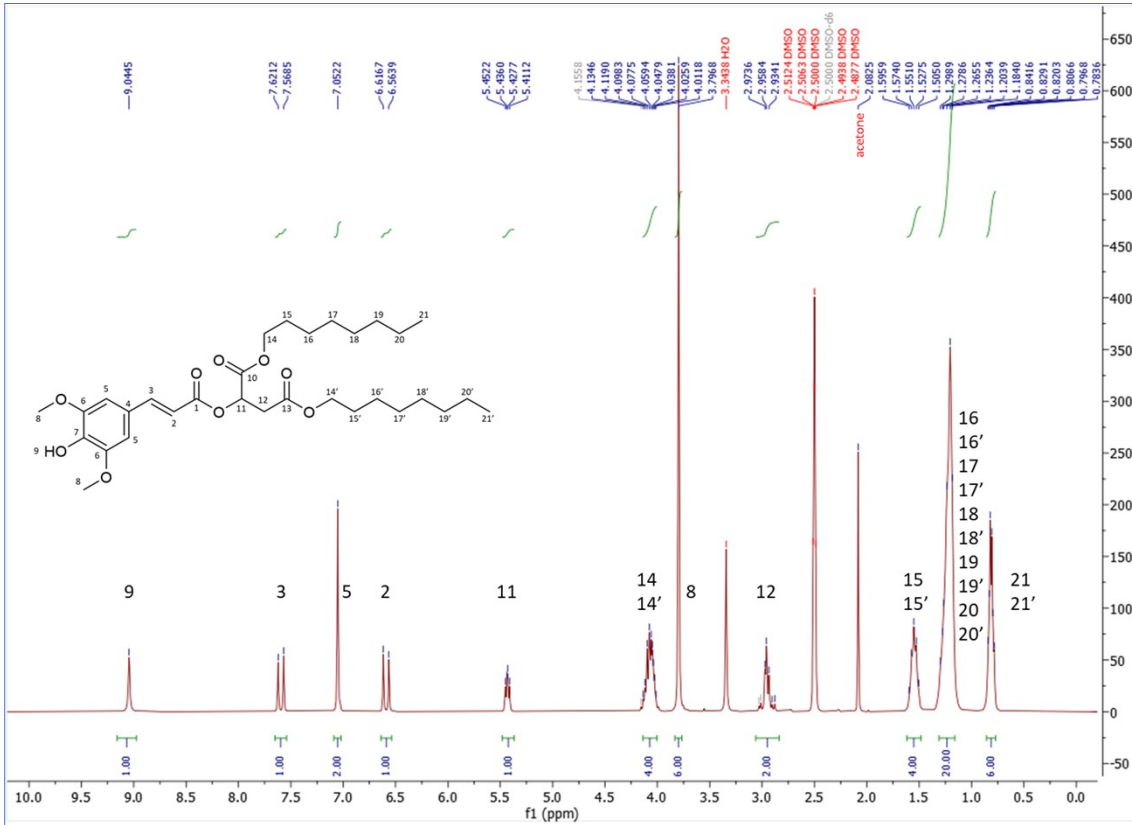

Figure S5: <sup>1</sup>H spectrum of dioctyl sinapoyl-L-malate.

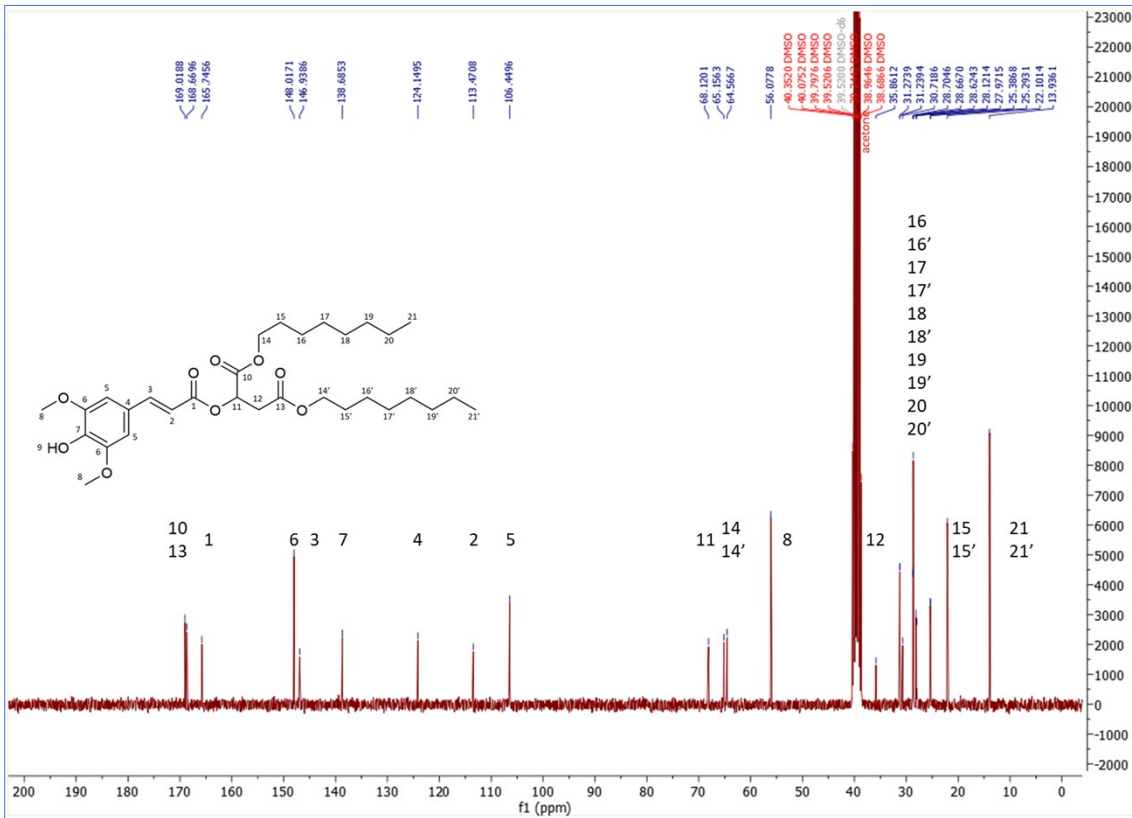

Figure S6: <sup>13</sup>C spectrum of dioctyl sinapoyl-L-malate.

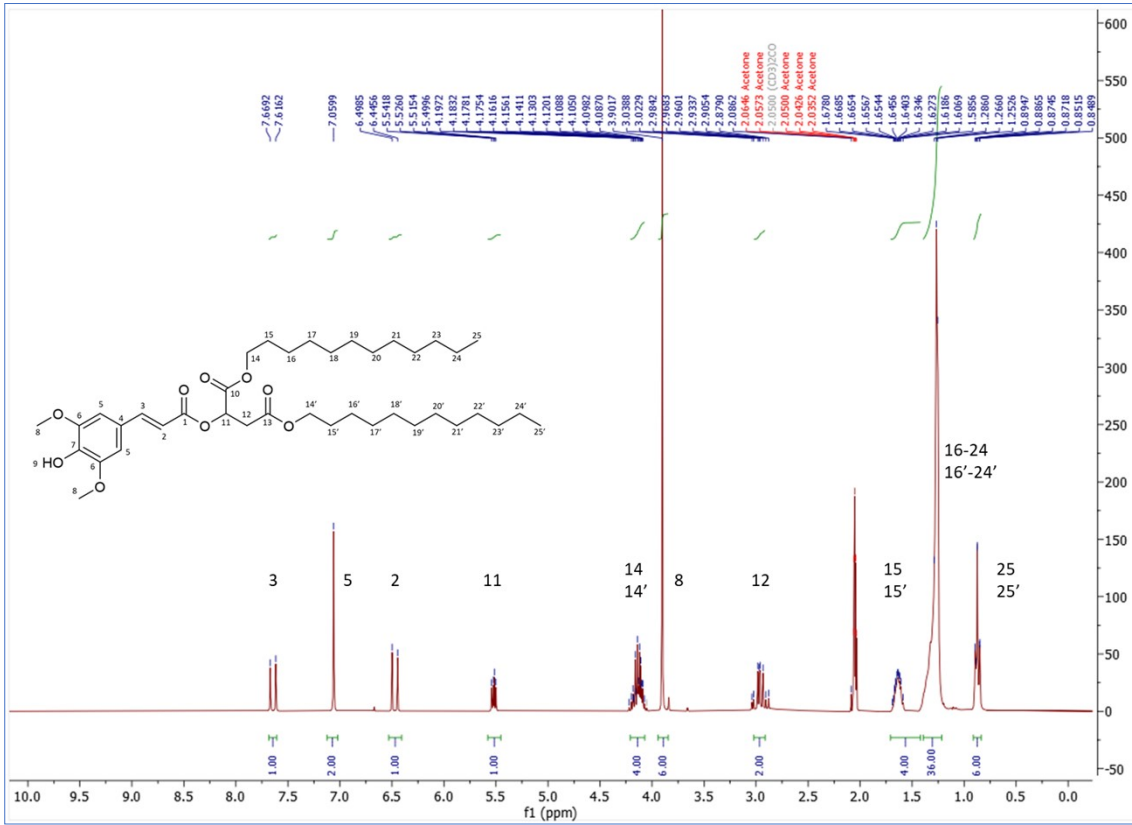

Figure S7: <sup>1</sup>H spectrum of dilauryl sinapoyl-L-malate.

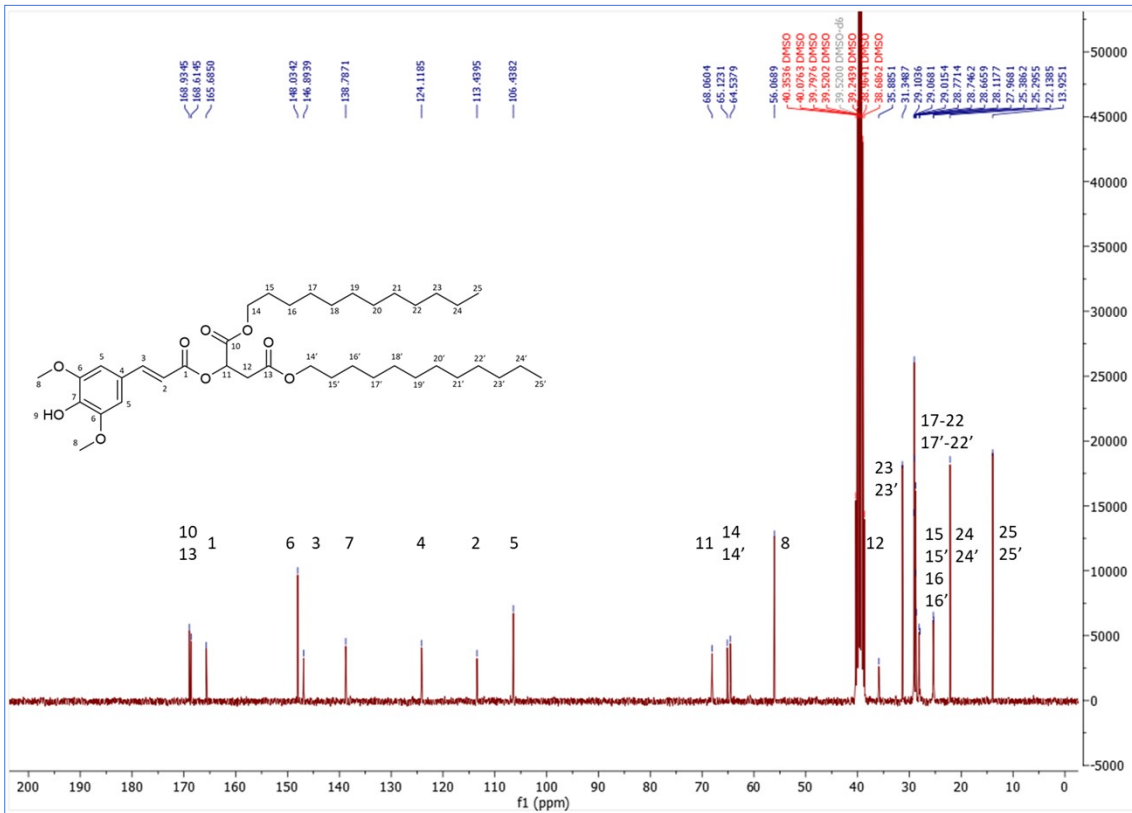

Figure S8: <sup>13</sup>C spectrum of dilauryl sinapoyl-L-malate.

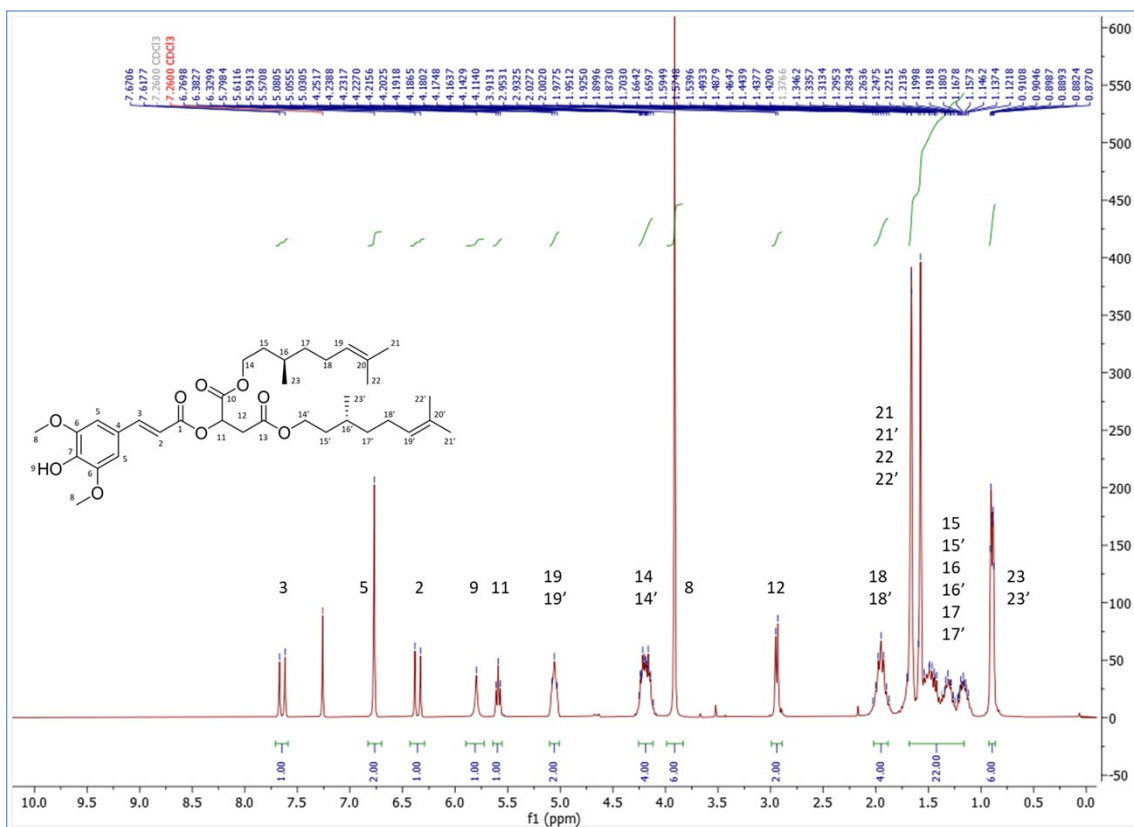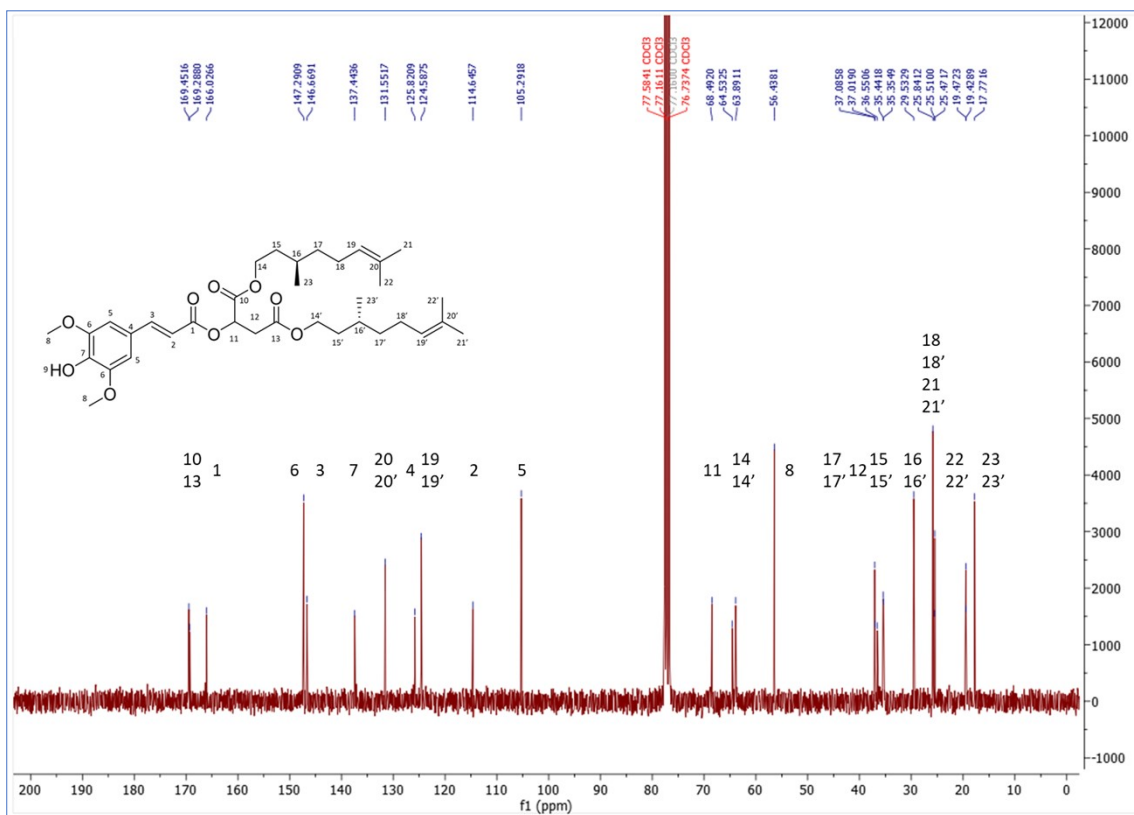

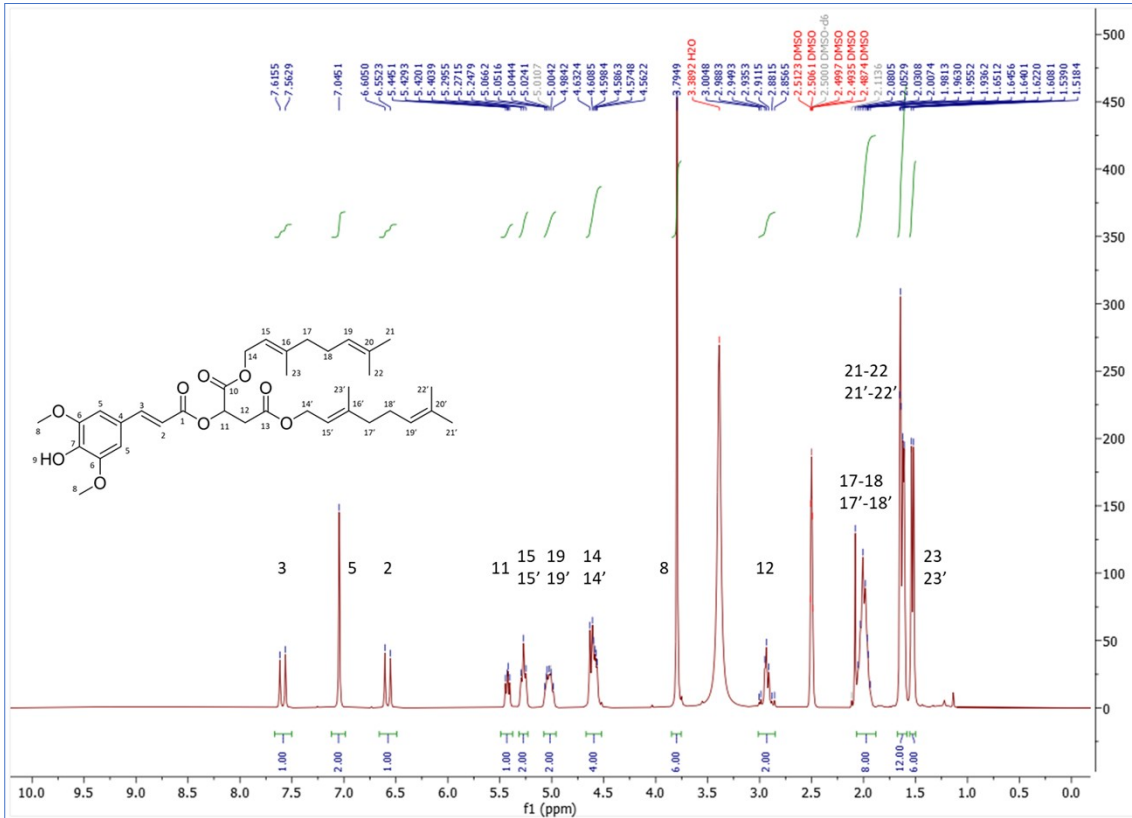

Figure S 11: <sup>1</sup>H spectrum of digeranlyl sinapoyl-L-malate.

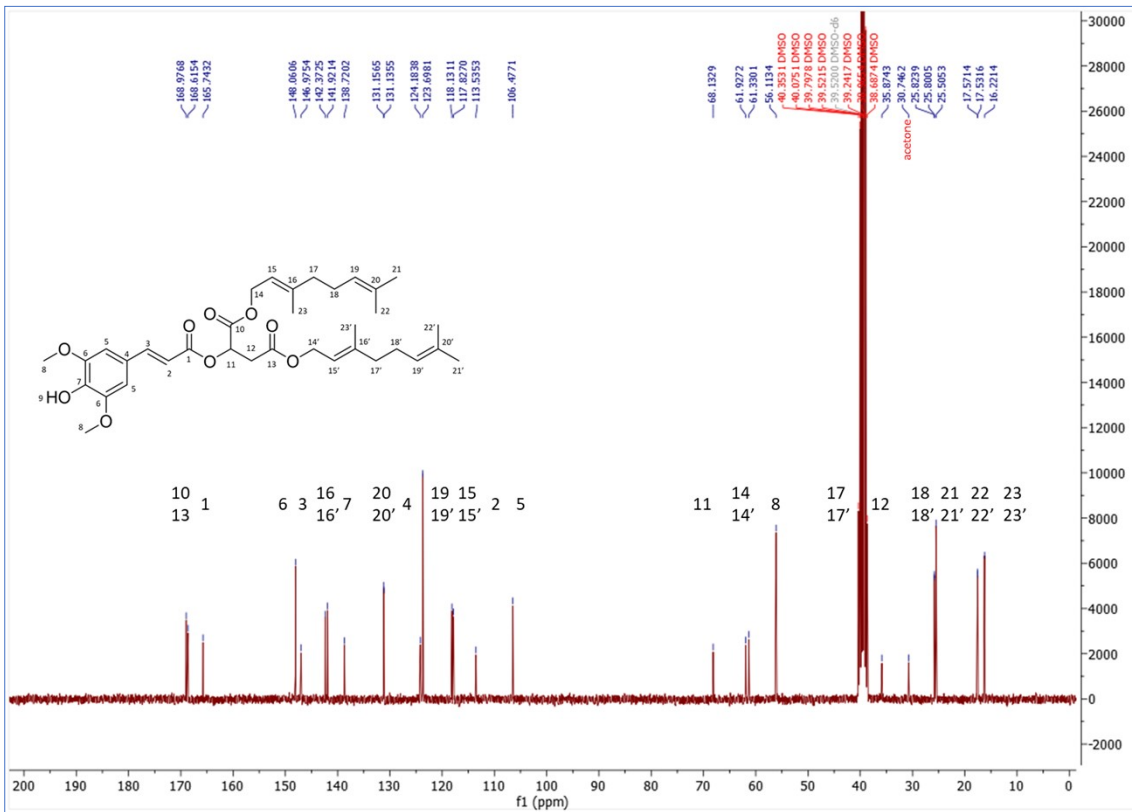

Figure S12: <sup>13</sup>C spectrum of digeranlyl sinapoyl-L-malate.

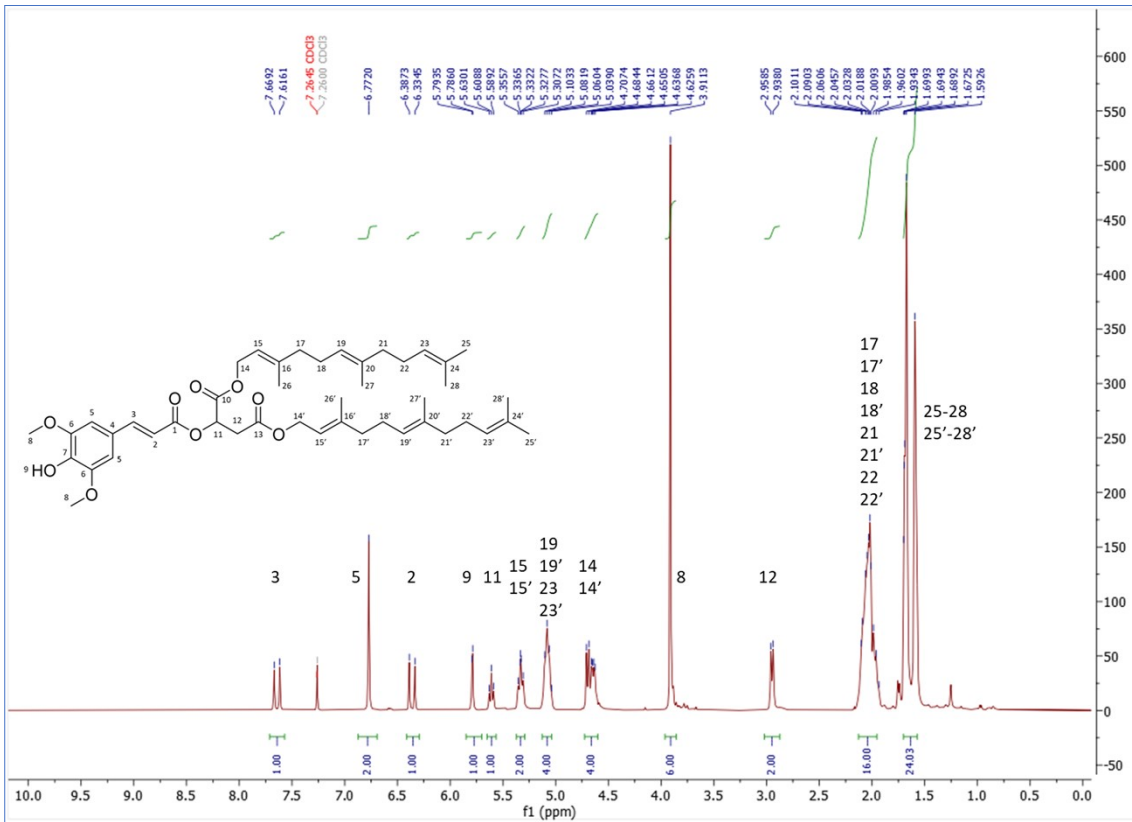

Figure S13: <sup>1</sup>H spectrum of difarnesyl sinapoyl-L-malate.

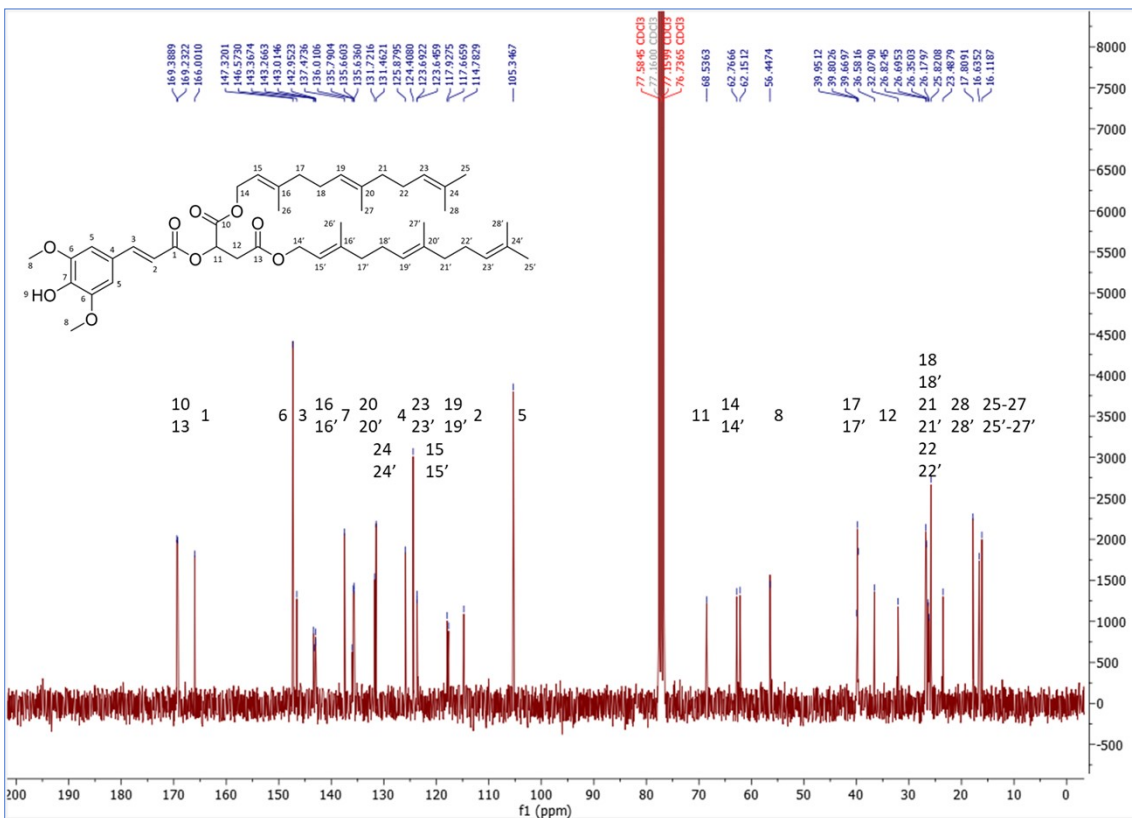

Figure S14: <sup>13</sup>C spectrum of difarnesyl sinapoyl-L-malate.

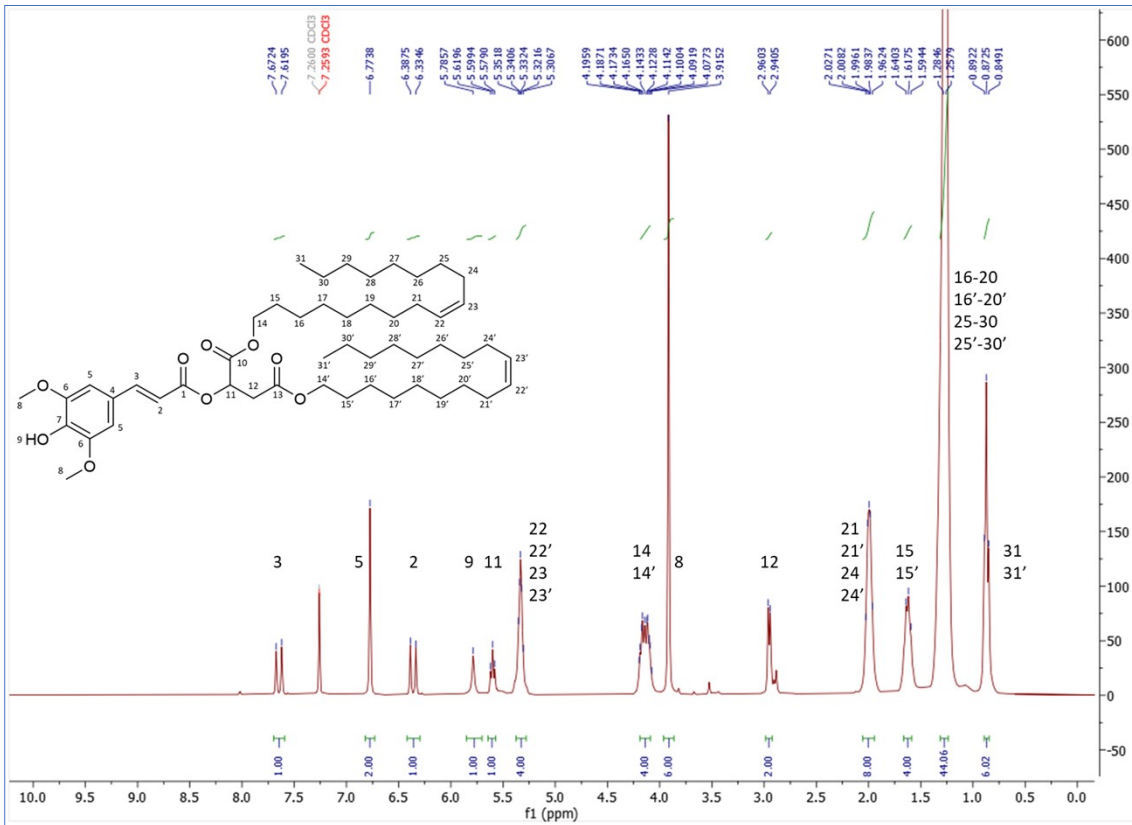

Figure S 15:  $^1\text{H}$  spectrum of diolelyl sinapoyl-L-malate.

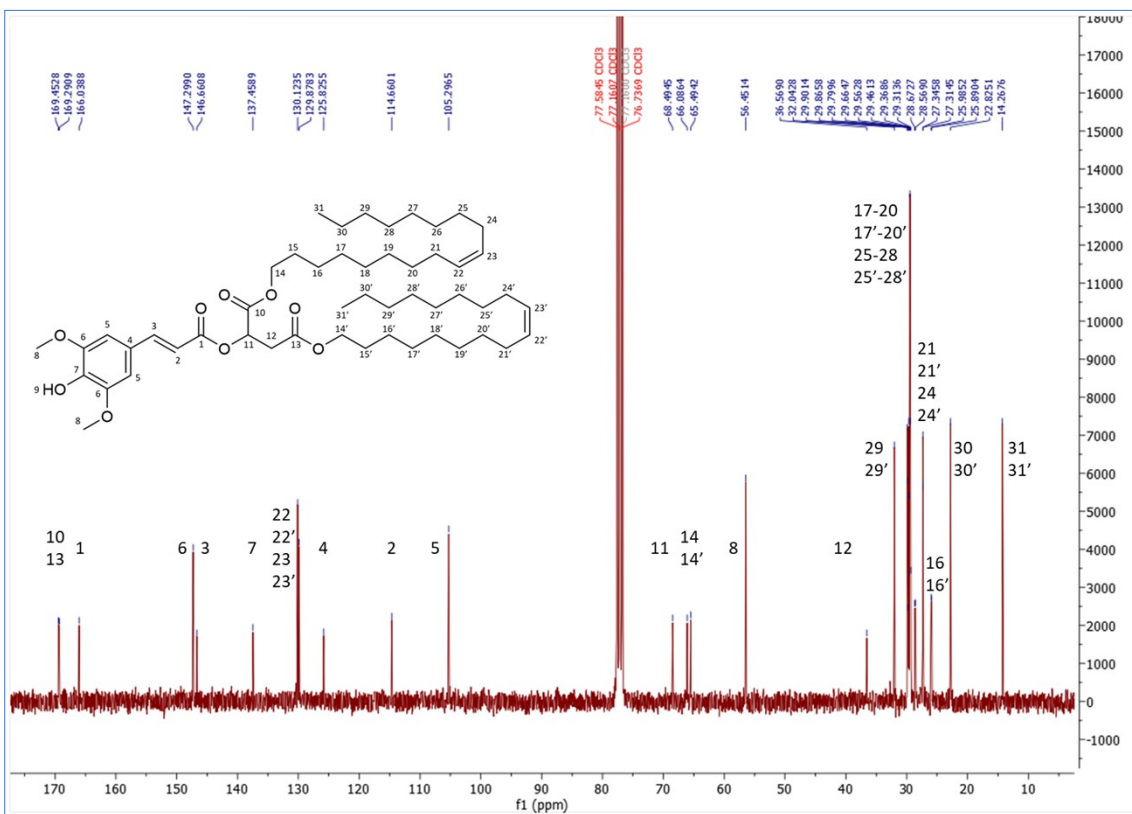

Figure S16:  $^{13}\text{C}$  spectrum of diolelyl sinapoyl-L-malate.

## HRMS spectra of diester sinapoyl-L-malate

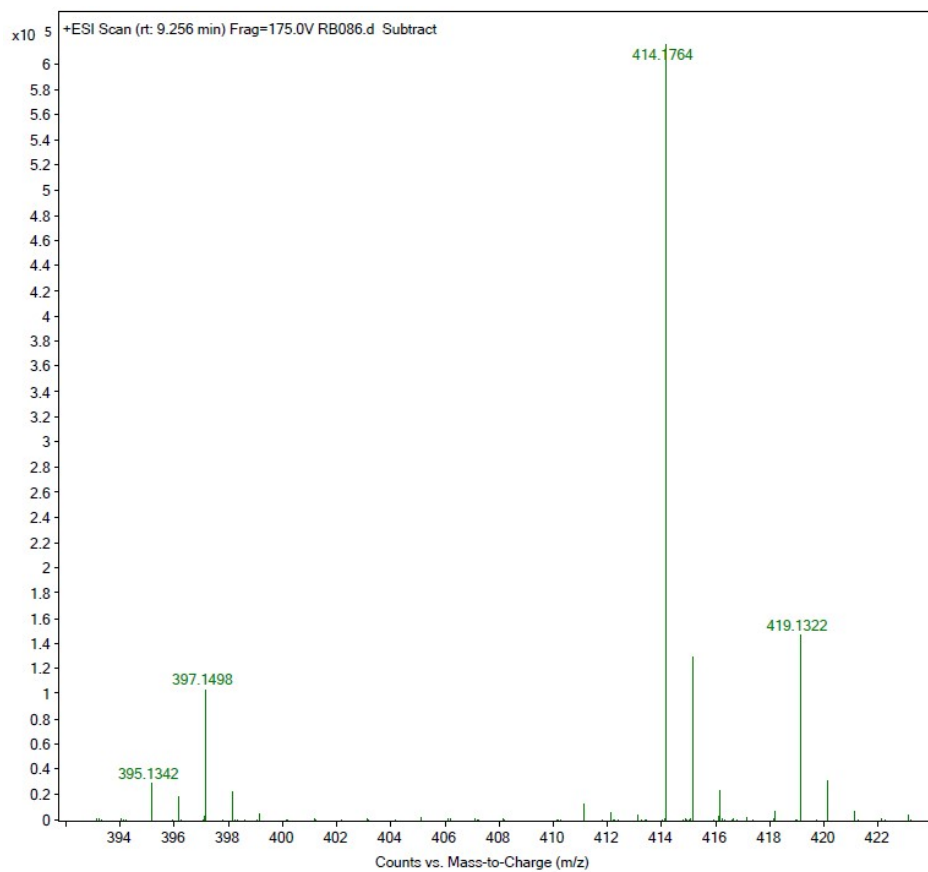

Figure S17: HRMS spectrum of diethyl sinapoyl-L-malate.

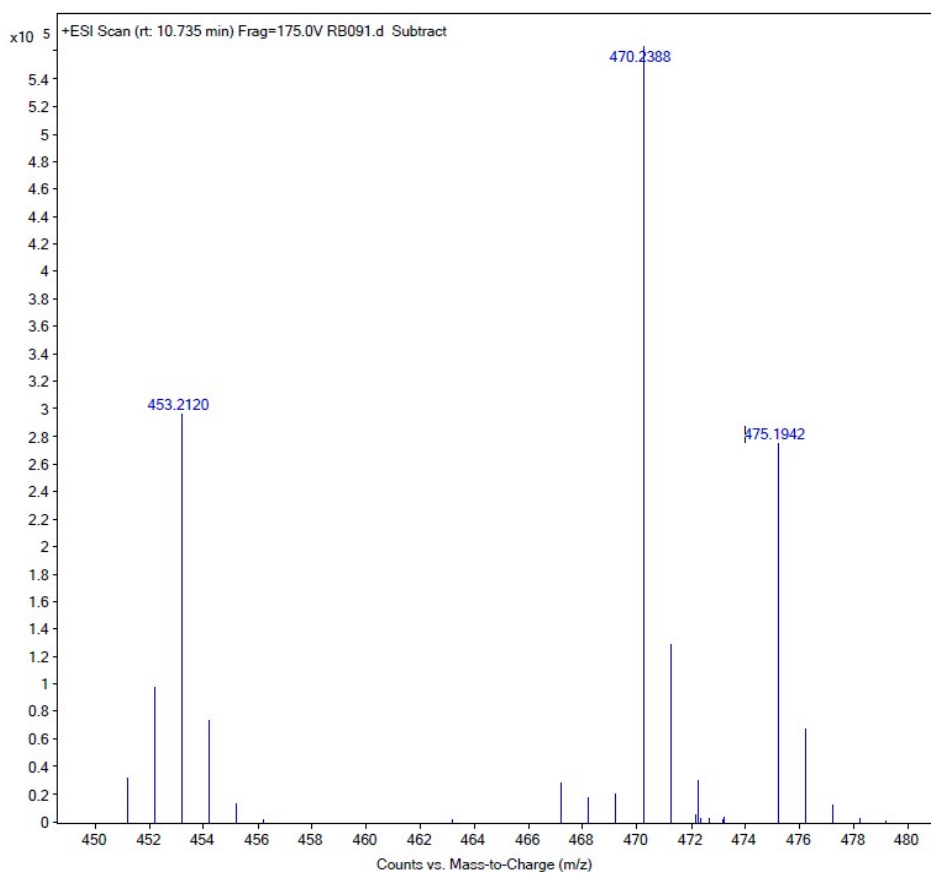

Figure S18: HRMS spectrum of dibutyl sinapoyl-L-malate.



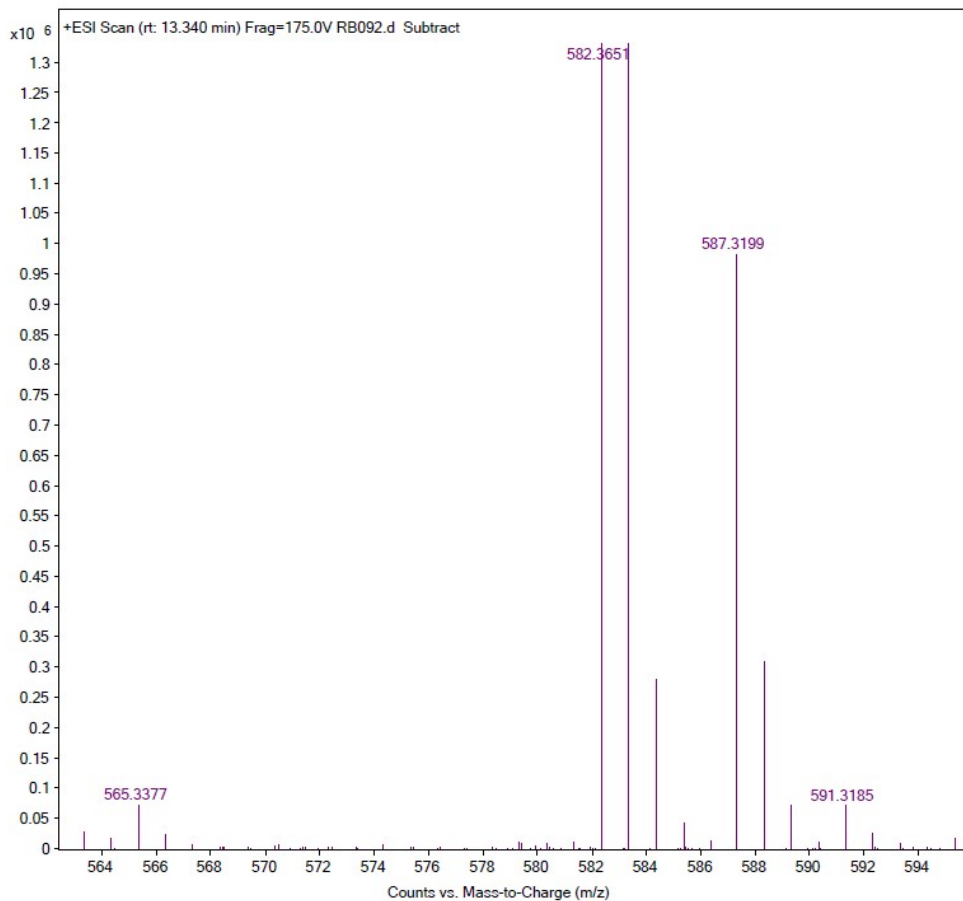

Figure S19: HRMS spectrum of dioctyl sinapoyl-L-malate.

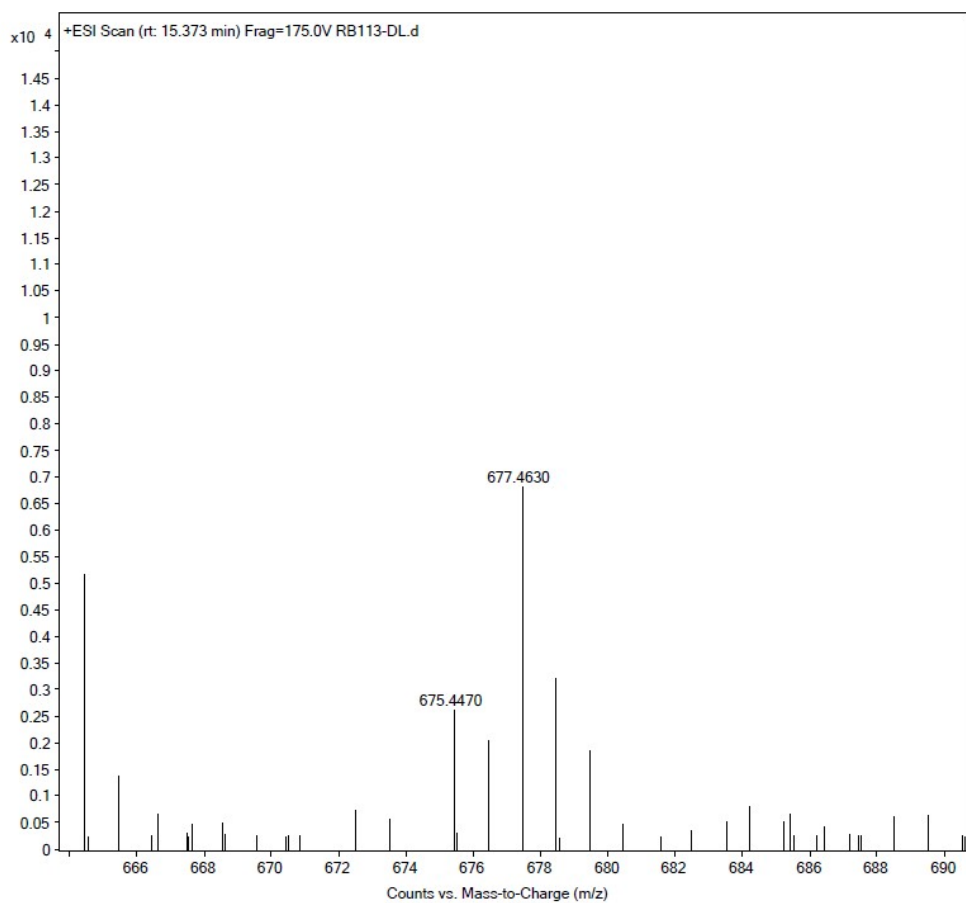

Figure S20: HRMS spectrum of dilauryl sinapoyl-L-malate.

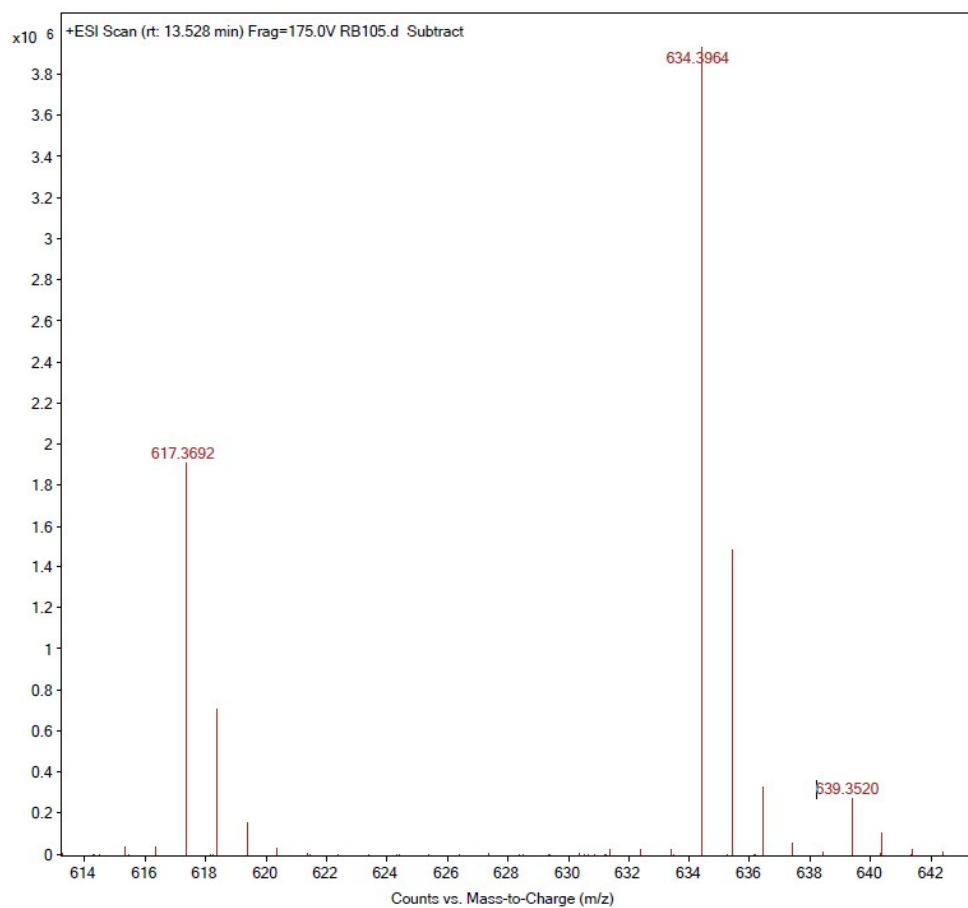

Figure S21: HRMS spectrum of dicitronellyl sinapoyl-L-malate.

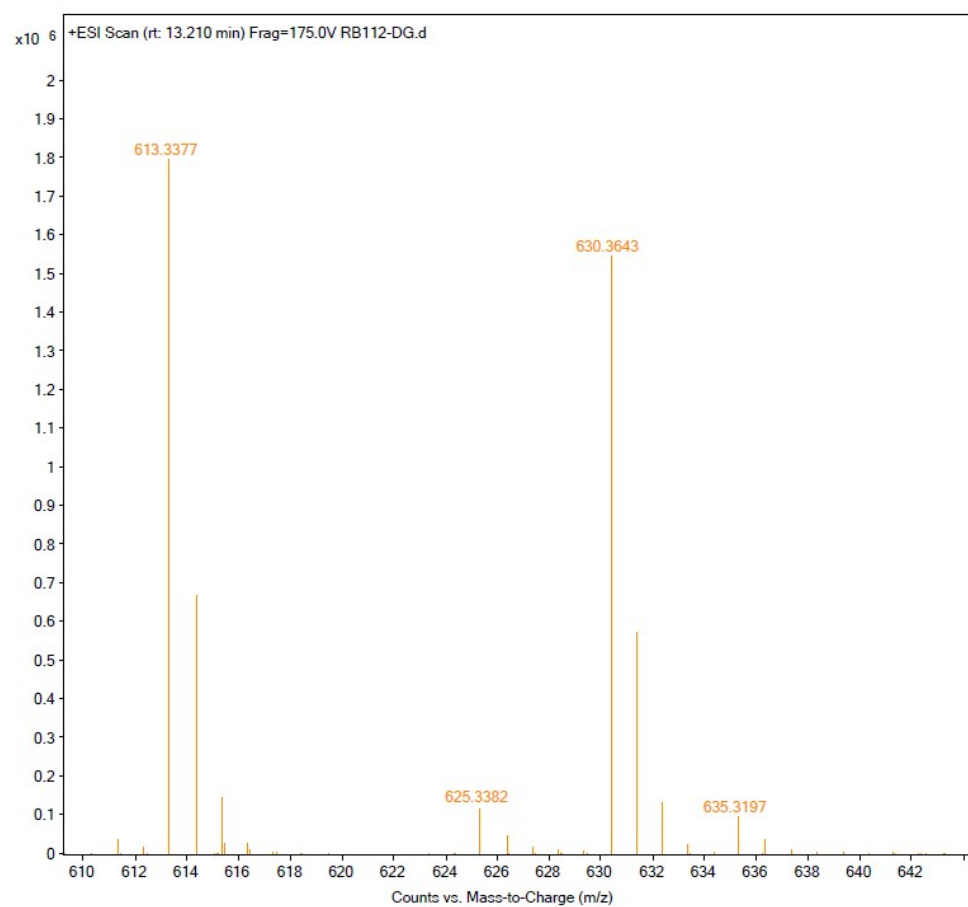

Figure S22: HRMS spectrum of digeranyl sinapoyl-L-malate.

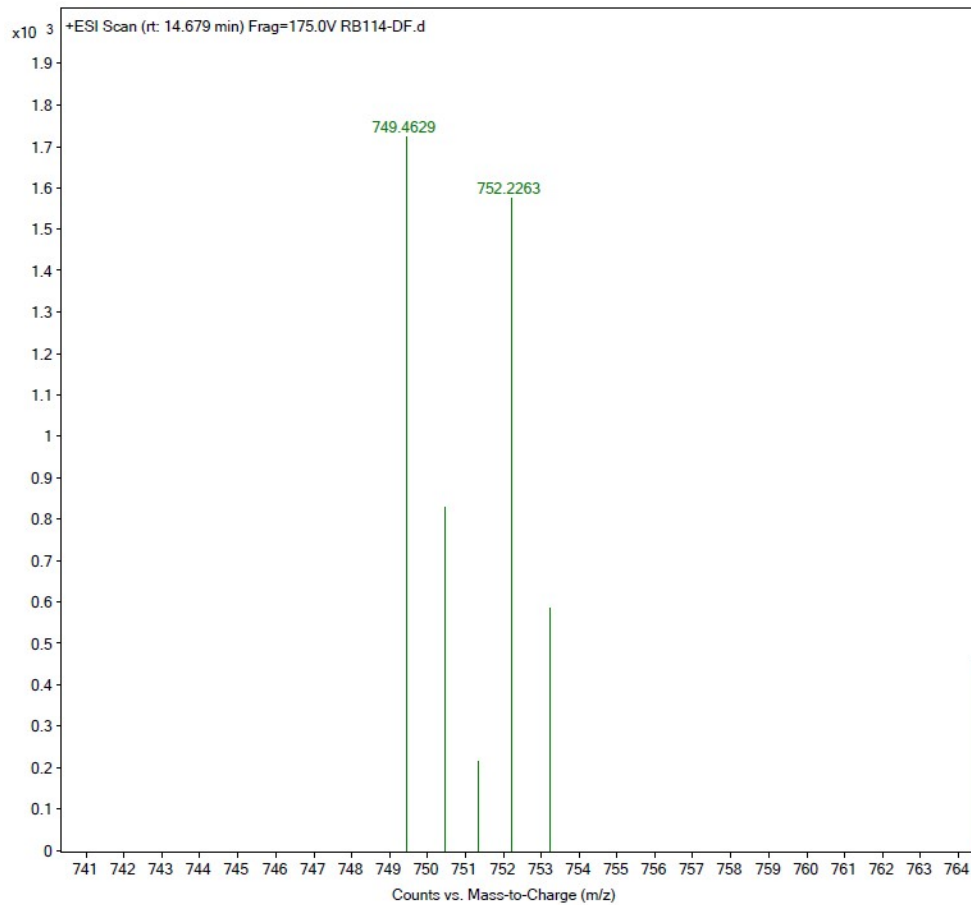

Figure S23: HRMS spectrum of difarnesyl sinapoyl-L-malate.

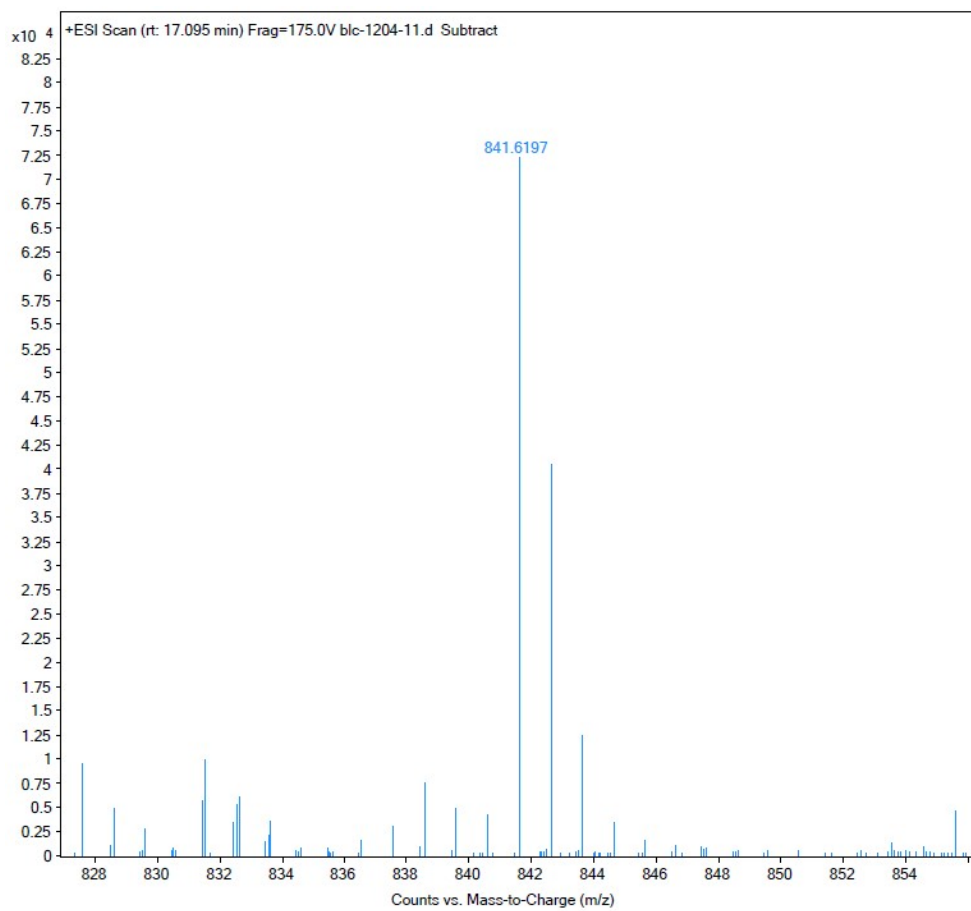

Figure S24: HRMS spectrum of diolelyl sinapoyl-L-malate.

## UV-Photostability spectra of diester sinapoyl-L-malate

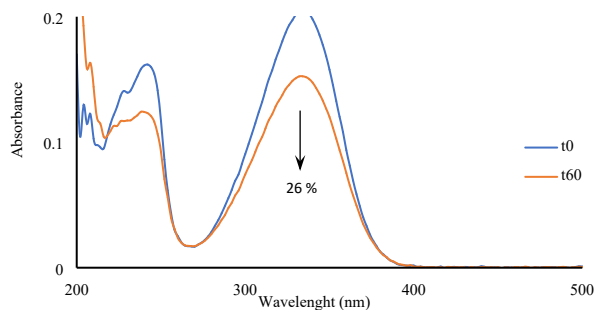

Figure S25: UV Photostability of diethyl sinapoyl-L-malate.

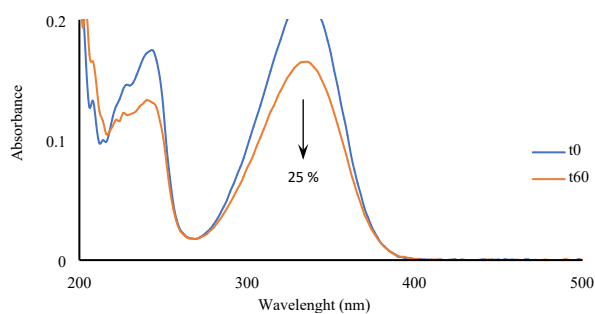

Figure S26: UV Photostability of dibutyl sinapoyl-L-malate.

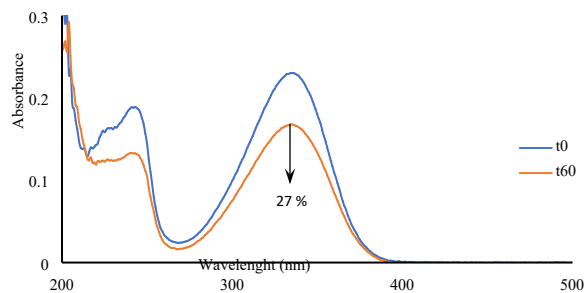

Figure S27: UV Photostability of dioctyl sinapoyl-L-malate.

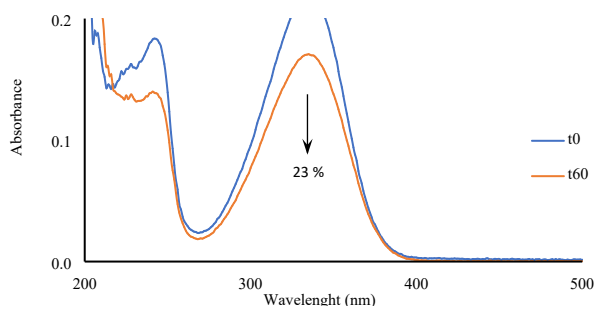

Figure S28: UV Photostability of dilauryl sinapoyl-L-malate.

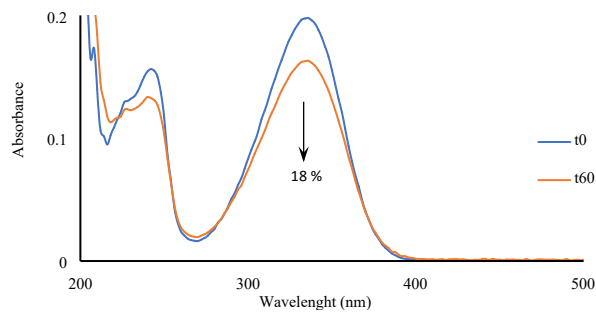

Figure S29: UV Photostability of dicitronellyl sinapoyl-L-malate.

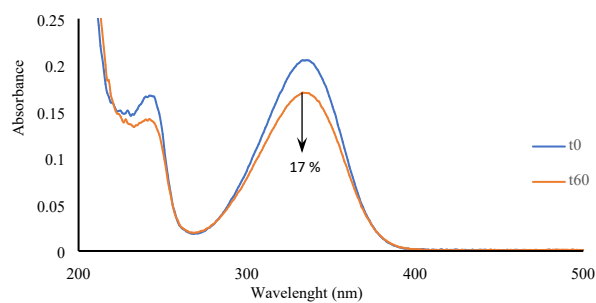

Figure S30: UV Photostability of digeranyl sinapoyl-L-malate.

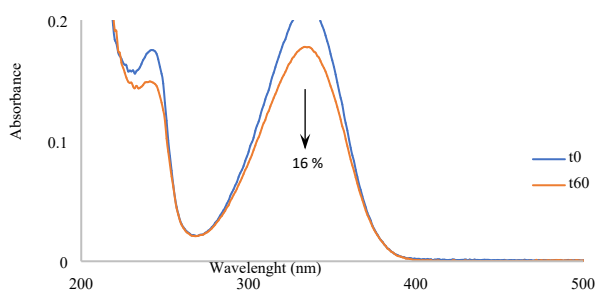

Figure S31: UV Photostability of difarnesyl sinapoyl-L-malate.

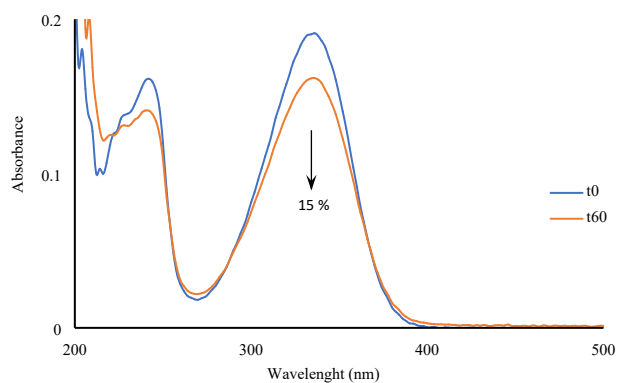

Figure S32: UV Photostability of dioleyl sinapoyl-L-malate.

## Antiradical activities

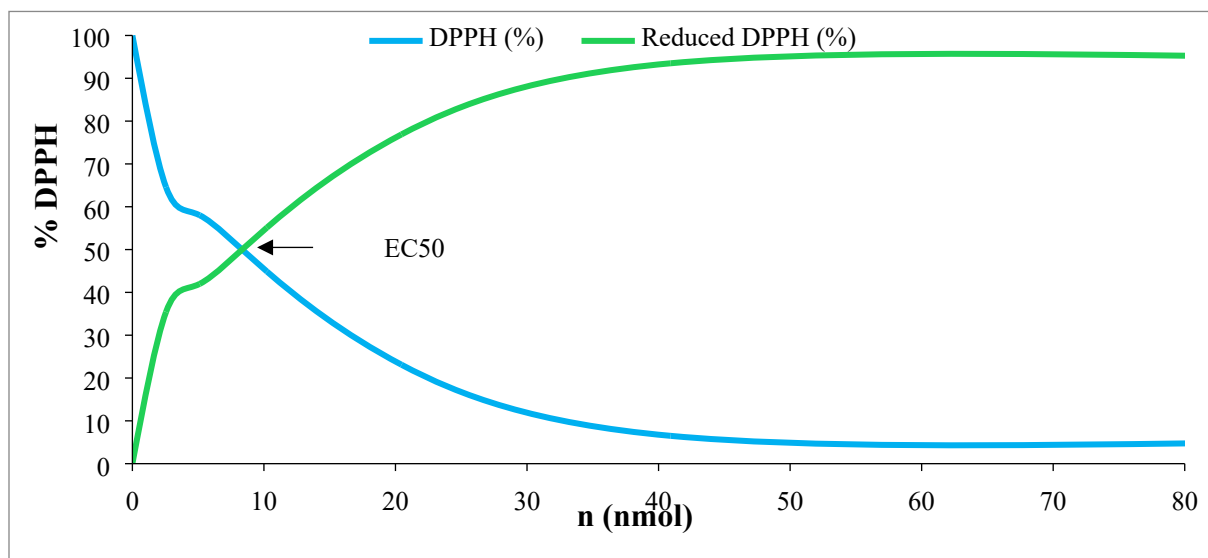

Figure S33: Antiradical activity of sinapoyl-L-malate

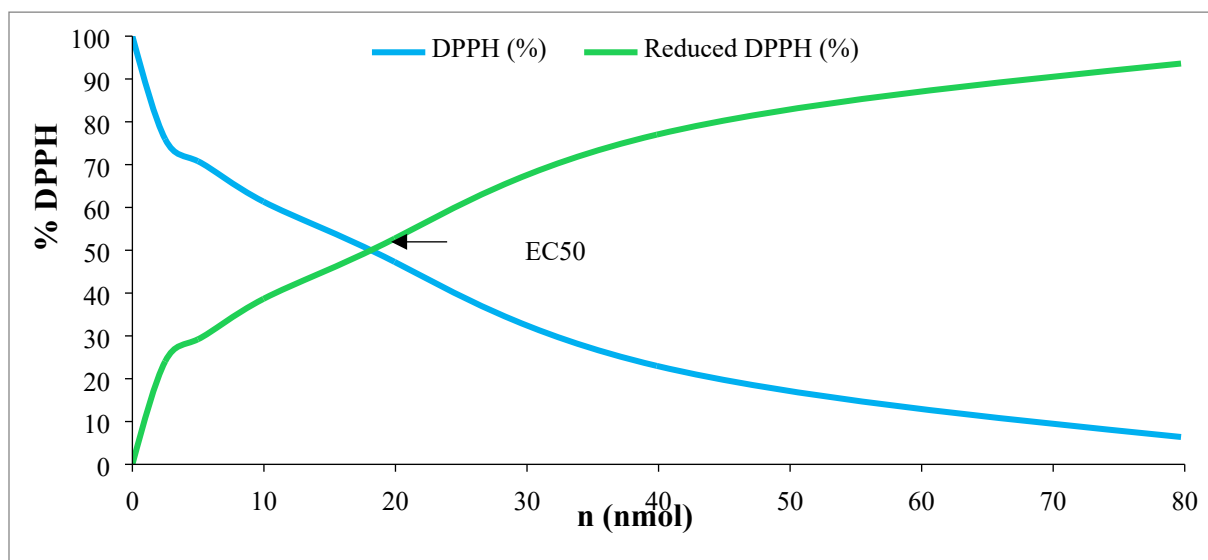

Figure S34: Antiradical activity of diethyl sinapoyl-L-malate.

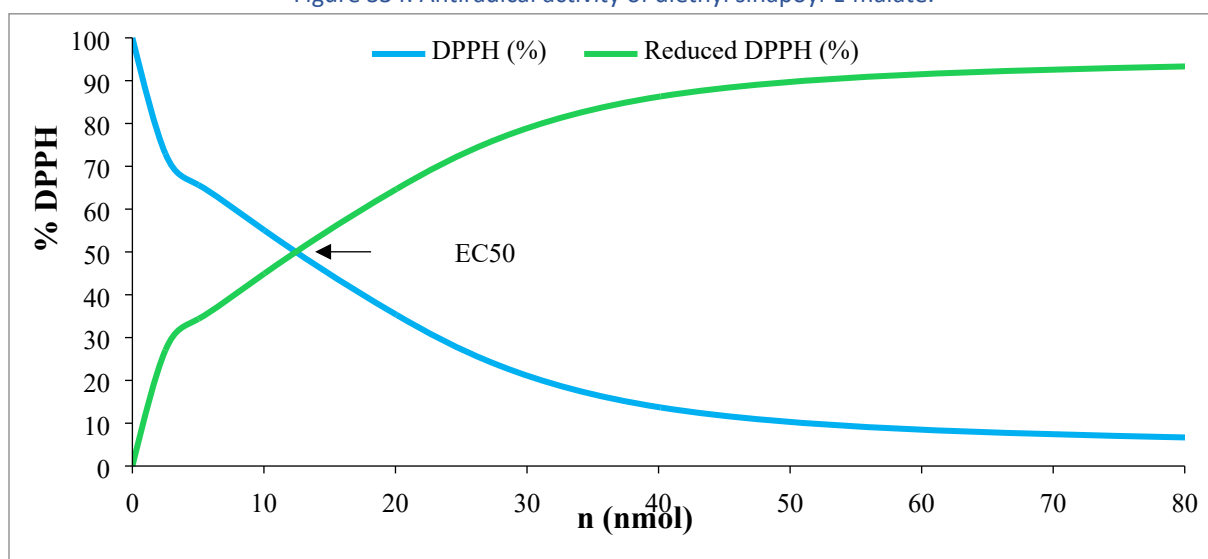

Figure S35: Antiradical activity of dibutyl sinapoyl-L-malate.

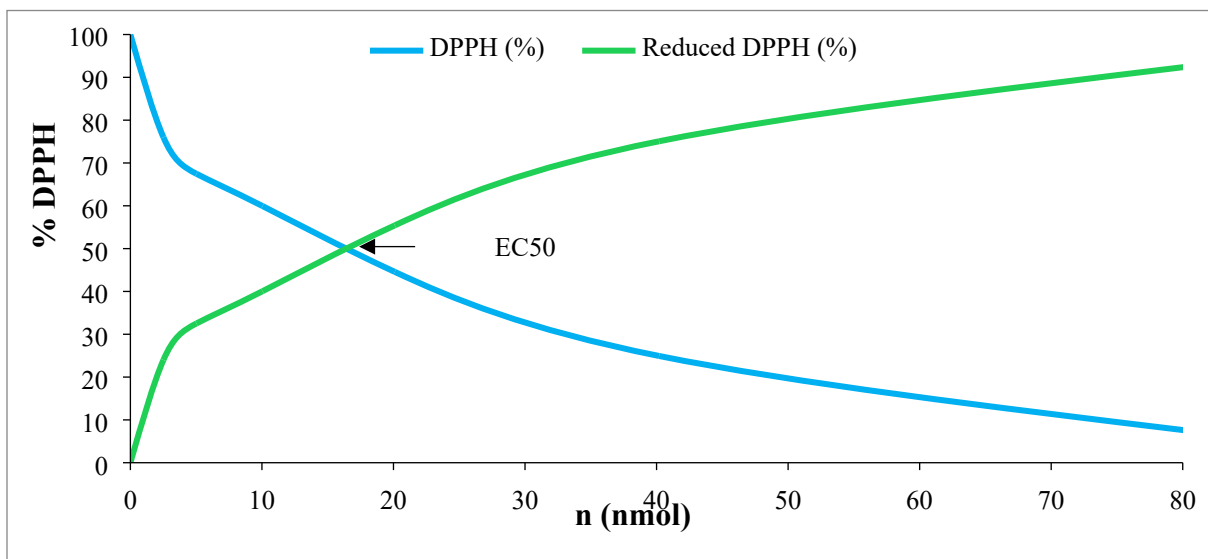

Figure S36: Antiradical activity dioctyl sinapoyl-L-malate.

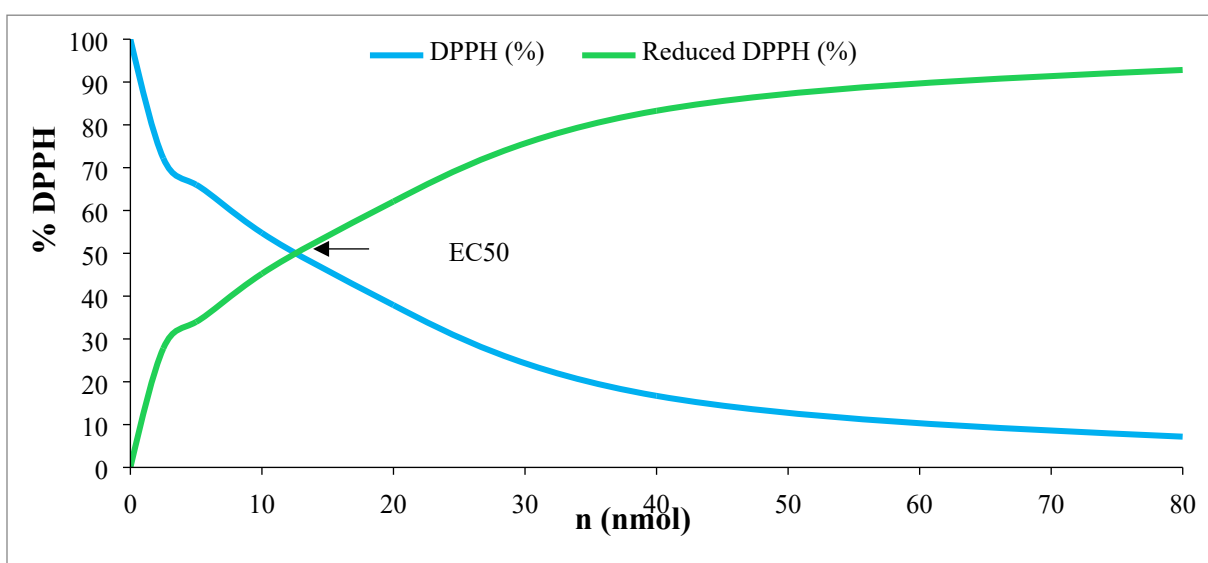

Figure S37: Antiradical activity of dilauryl sinapoyl-L-malate.

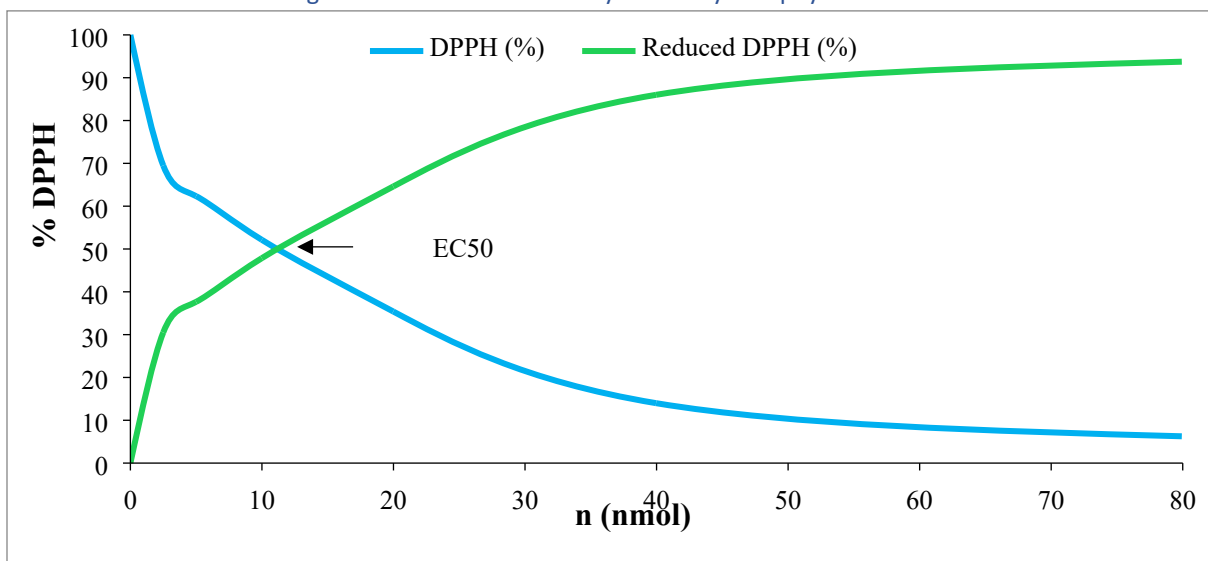

Figure S38: Antiradical activity of dicitronellyl sinapoyl-L-malate.

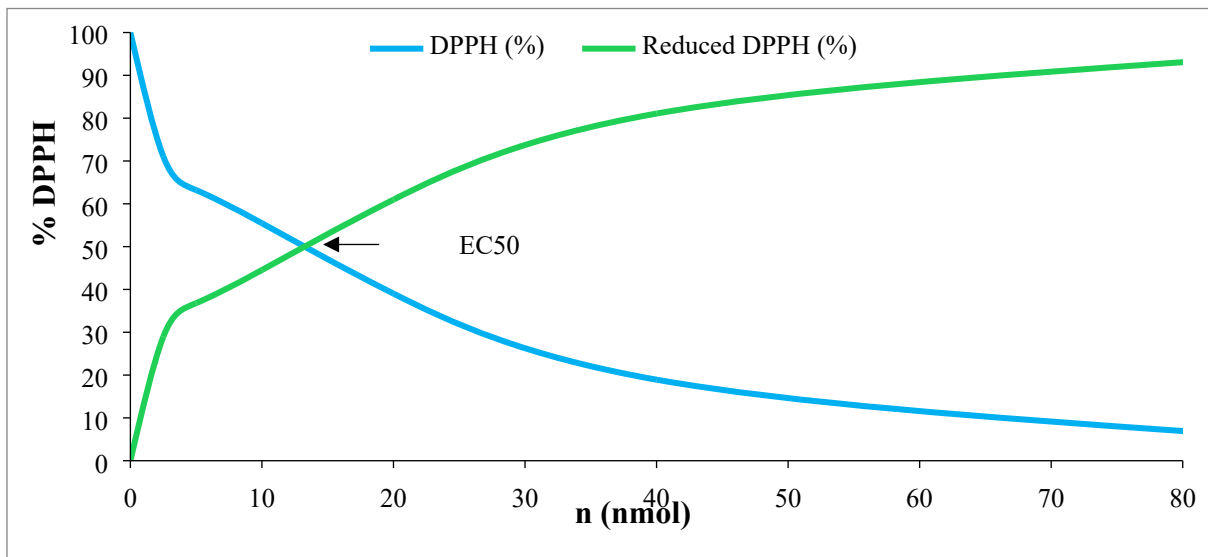

Figure S39: Antiradical activity of digeranyl sinapoyl-L-malate.

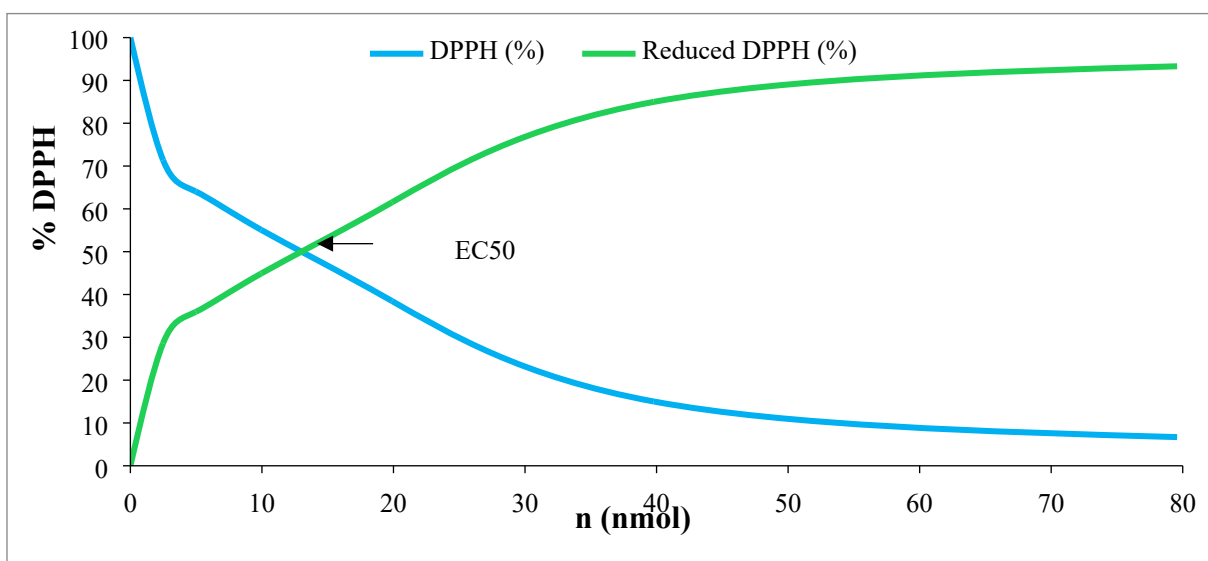

Figure S40: Antiradical activity of difarnesyl sinapoyl-L-malate.

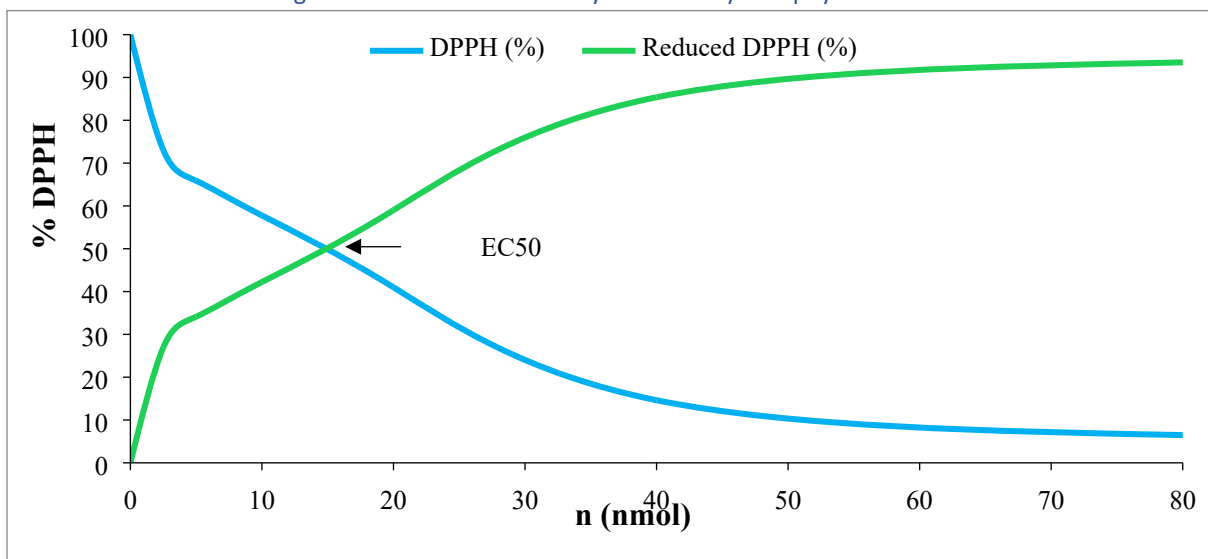

Figure S41: Antiradical activity of diolelyl sinapoyl-L-malate.



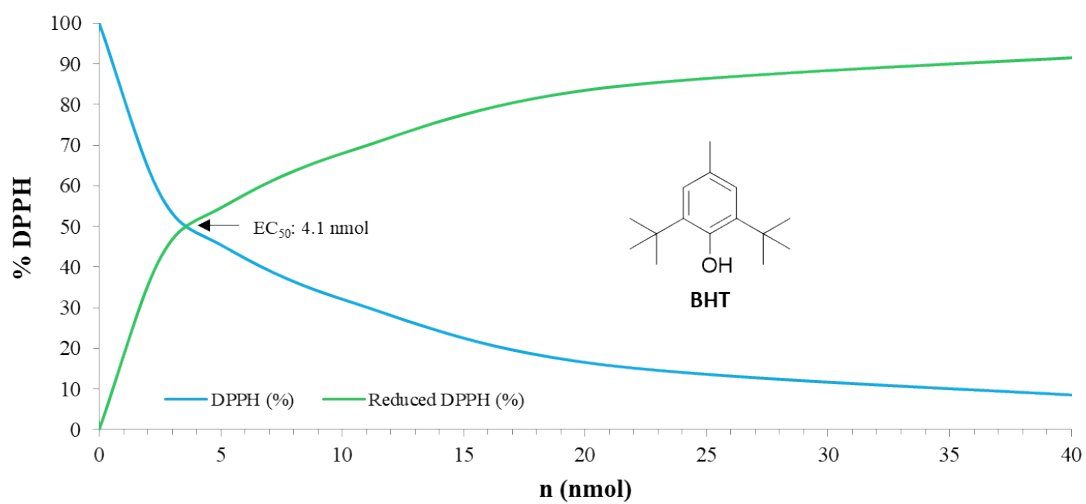

Figure S42: Antiradical activity of butylated hydroxytoluene.

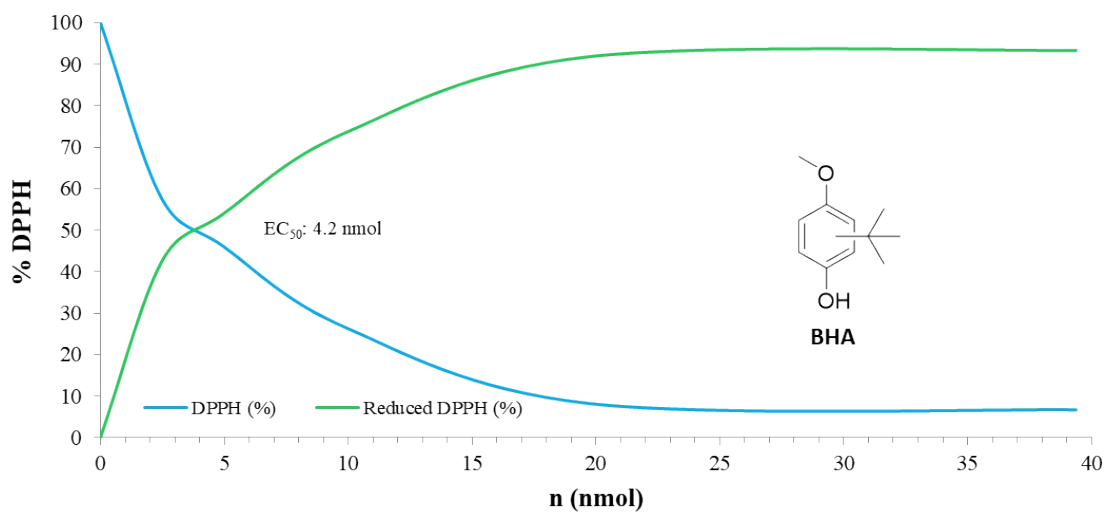

Figure S43: Antiradical activity of butylated hydroxyanisole.

## Simulated Solar irradiation experiments

An ABET Technologies Sun 2000 solar simulator is used for irradiation experiments and provides a 0.96 solar equivalent power spectrum. Figure S44 shows that this lamp has a broad spectrum well correlated to the actual solar spectrum observed at sea level.

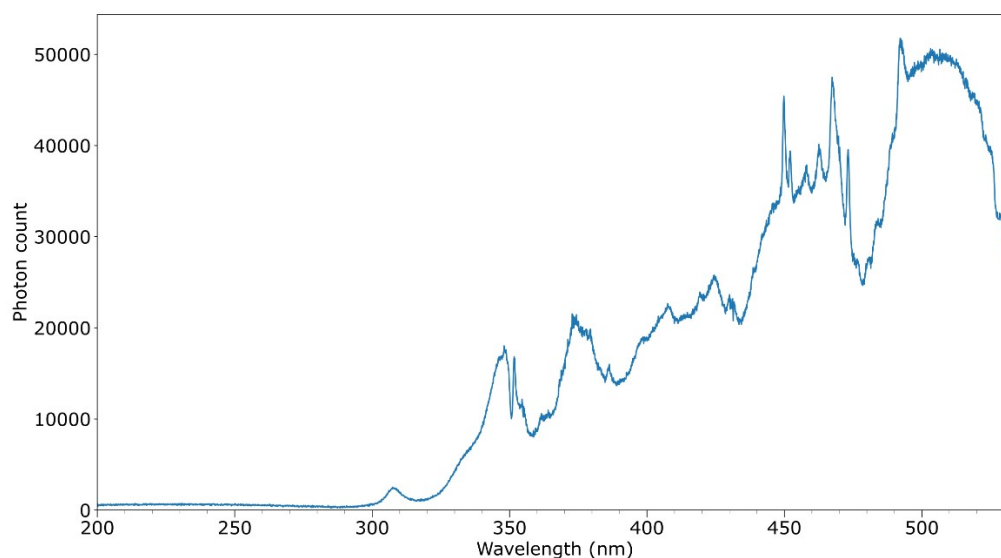

Figure S44: Measured ABET Technologies Sun 2000 solar simulator lamp spectrum.

## Infrared Ion Spectroscopy vibrational analysis of DOSM

In this supplementary information, we discuss the computed vibrational bands of figure 5 in the main publication.

We begin by analyzing the spectrum of the protonated ion. The absence of a strong carbonyl stretching band near  $1800\text{ cm}^{-1}$  suggests that the protonation of DO2HS involves a proton-shared motif that includes both carboxylic acid groups. The spectral match between computed and experimental spectra confirms that the two carboxylics are hydrogen bonded, as seen in Figure S45. Examining other significant features in the spectrum, we observe an intense doublet near  $1350\text{ cm}^{-1}$ , attributed to the two  $\text{CH}_2$  wagging vibrations of both octyl chains. The doublet at  $1450\text{ cm}^{-1}$  is due to the  $\text{CH}_2$  scissoring vibrations on both octyl chains directly attached to the ester function. This is in combination with an OH stretch vibration of the proton captured between the carboxylic functions. Its shoulder feature at  $1550\text{ cm}^{-1}$  is attributed to an OH bending mode of the captured proton, for which a second mode is observed at  $1200\text{ cm}^{-1}$ . This last feature is also attributable to a  $\text{CH}_2$  wagging mode of the octyl groups. Lastly, the feature at  $1150\text{ cm}^{-1}$  is attributed to a C-O stretching vibration of the hydroxyl group on DO2HS.

For  $\text{Na}^+\text{-DO2HS}$ , an intense vibration at  $1725\text{ cm}^{-1}$  is observed, which can be attributed to the C=O stretching vibrations of either ester group in DO2HS. Within the triplet feature centered at  $1400\text{ cm}^{-1}$ , the peak closest to  $1500\text{ cm}^{-1}$  corresponds to the  $\text{CH}_2$  scissoring of the methylene group attached to the ester function of the octyl 3-hydroxypropanoate ester moiety. The other two peaks in the triplet are associated with different  $\text{CH}_2$  wagging modes of the same ester moiety. There is a broad and prominent peak at  $1230\text{ cm}^{-1}$ , comprising three absorption bands. The most intense absorption at  $1300\text{ cm}^{-1}$  is due to an OH bending mode combined with  $\text{CH}_2$  wagging of the methylene between the ester functions. The two remaining absorption bands are due to a CH bending mode of the same moieties.

Additionally, two more vibrational modes result in a shoulder feature slightly above  $1300\text{ cm}^{-1}$ . The first mode comprises a combination of CH bending and  $\text{CH}_2$  twisting of both octyl chains, while the second mode is a delocalized CH bending mode of the entire molecule. We can observe two peaks below  $1100\text{ cm}^{-1}$ . The peak at  $950\text{ cm}^{-1}$  is attributed to the  $\text{CH}_2$  wagging of the octyl 3-hydroxypropanoate ester moiety, while the one at  $1100\text{ cm}^{-1}$  is caused by  $\text{CH}_2$  twisting in the methylene functionality in between the two ester functions.

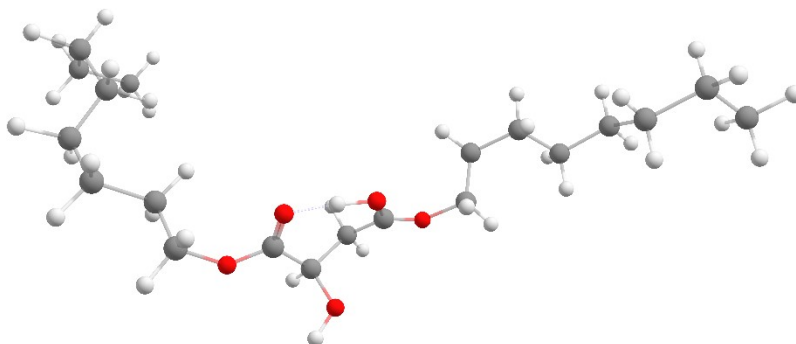

Figure S45: 3D computed structure of DG2HS depicting hydrogen bonding between the two carboxyl groups.

### Infrared Ion Spectroscopy vibrational analysis of DGSM

In this supplementary information, we discuss the computed vibrational bands of figure 6 in the main publication.

The geraniol esters exhibit two C=C stretch vibrations, causing the feature at  $1650\text{ cm}^{-1}$ , while the C=O stretch of the 3-hydroxybutyrate moiety carries the carboxylic stretch at  $1725\text{ cm}^{-1}$ . The second carboxylic vibration, involving both carbonyls coordinating with the cesium atom, produces the shoulder at lower wavenumbers.

The right-side peak of the doublet at  $1415\text{ cm}^{-1}$  results from a combination of CH bending and wagging vibrations of the two geraniol tails. The peak on the left side is attributed to the  $\text{CH}_2$  wagging vibration of the two  $\text{CH}_2$  moieties of the 3-hydroxybutyrate moiety combined with an O-H bending vibration, resulting in only one absorption band responsible for the feature.

The measured spectrum displays a strong band at  $1205\text{ cm}^{-1}$ , comprising two unresolved features and another feature at  $1275\text{ cm}^{-1}$ . This was observed when measured with a wavelength step of  $3\text{ cm}^{-1}$  and reduced laser power. Upon examining the computed spectrum of DG2HS, a similar peak pattern was found, with a slightly higher predicted wavenumber for the absorption band in the center. The first peak is due to the O-H bending vibration, while the second peak is attributed to a secondary OH bending mode combined with the  $\text{CH}_2$  wagging of the  $\text{CH}_2$  group sandwiched between the esters. The third peak of the triplet is due to the twisting vibration of both  $\text{CH}_2$  groups of the geraniol tails, which are directly attached to the ester moieties.

At lower wavenumbers, two distinct peaks in the IRIS spectrum provide significant information about the sample. The first peak is observed at  $1090\text{ cm}^{-1}$  and is attributed to the C-O stretching of the alcohol. A minor shoulder is also observed at  $1040\text{ cm}^{-1}$ , caused by a  $\text{CH}_2$  twisting vibration of the  $\text{CH}_2$  group between the esters. The second peak is observed at  $919\text{ cm}^{-1}$  and is attributed to two CH bending vibrations of the double bond CH groups closest to the central esters of the two geraniol tails. Although the experiment-versus-theory match for this band is not perfect, we conclude that DG2HS is the primary degradation product of DGSM based on the information provided by the IRIS spectrum.

## Toxicology

Table S1. Translation of the VEGA, TEST and LAZAR predictions into a mutagenicity/carcinogenicity score.

| Prediction                                | Reliability          | Score |
|-------------------------------------------|----------------------|-------|
| mutagenic/carcinogenic                    | experimental data    | 1     |
| mutagenic/carcinogenic                    | good reliability     | 0.9   |
| possible mutagenic/carcinogenic           | good reliability     | 0.8   |
| mutagenic/carcinogenic                    | moderate reliability | 0.7   |
| possible mutagenic/carcinogenic           | moderate reliability | 0.6   |
| (possible) mutagenic/carcinogenic         | low reliability      | 0.5   |
| (possible) non-mutagenic/non-carcinogenic | low reliability      | 0.5   |
| possible non-mutagenic/non-carcinogenic   | moderate reliability | 0.4   |
| non-mutagenic/non-carcinogenic            | moderate reliability | 0.3   |
| possible non-mutagenic/non-carcinogenic   | good reliability     | 0.2   |
| non-mutagenic/non-carcinogenic            | good reliability     | 0.1   |
| non-mutagenic/non-carcinogenic            | experimental data    | 0     |

Table S2. Translation of the VEGA predictions into a persistence score.

| VEGA prediction                     | Reliability          | Score |
|-------------------------------------|----------------------|-------|
| persistent                          | experimental data    | 1     |
| P/vP or vP or >120 days or >40 days | good reliability     | 0.9   |
| P/vP or vP or >120 days or >40 days | moderate reliability | 0.7   |
| P/vP or vP or >120 days or >40 days | low reliability      | 0.5   |
| nP or nP/P or <120 days or <40 days | low reliability      | 0.5   |
| nP or nP/P or <120 days or <40 days | moderate reliability | 0.3   |
| nP or nP/P or <120 days or <40 days | good reliability     | 0.1   |
| non-persistent                      | experimental data    | 0     |

Table S3. Translation of the ISIDA predictions into a persistence score.

| ISIDA prediction | Reliability         | Score |
|------------------|---------------------|-------|
| persistent       | experimental data   | 1     |
| persistent       | optimal reliability | 0.9   |
| persistent       | good reliability    | 0.766 |
| persistent       | average reliability | 0.633 |
| persistent       | outside AD          | 0.5   |
| non-persistent   | outside AD          | 0.5   |
| non-persistent   | average reliability | 0.366 |
| non-persistent   | good reliability    | 0.233 |
| non-persistent   | optimal reliability | 0.1   |
| non-persistent   | experimental data   | 0     |

Table S4. Predictions on the endocrine toxicity using VEGA platform.

| Substance | VEGA computational model                    | Prediction | Reliability |
|-----------|---------------------------------------------|------------|-------------|
| SM        | Estrogen Receptor Relative Binding Affinity | active     | low         |
|           | Estrogen Receptor-mediated effect           | inactive   | good        |
|           | Androgen Receptor-mediated effect           | inactive   | moderate    |
|           | Thyroid Receptor Alpha effect               | inactive   | good        |
|           | Thyroid Receptor Beta effect                | inactive   | good        |
| DESM      | Estrogen Receptor Relative Binding Affinity | active     | low         |
|           | Estrogen Receptor-mediated effect           | inactive   | good        |

|         |                                             |          |          |
|---------|---------------------------------------------|----------|----------|
|         | Androgen Receptor-mediated effect           | inactive | moderate |
|         | Thyroid Receptor Alpha effect               | inactive | good     |
|         | Thyroid Receptor Beta effect                | inactive | good     |
| DBSM    | Estrogen Receptor Relative Binding Affinity | active   | low      |
|         | Estrogen Receptor-mediated effect           | inactive | good     |
|         | Androgen Receptor-mediated effect           | inactive | moderate |
|         | Thyroid Receptor Alpha effect               | inactive | good     |
|         | Thyroid Receptor Beta effect                | inactive | good     |
| DOSM    | Estrogen Receptor Relative Binding Affinity | active   | low      |
|         | Estrogen Receptor-mediated effect           | inactive | good     |
|         | Androgen Receptor-mediated effect           | inactive | moderate |
|         | Thyroid Receptor Alpha effect               | inactive | good     |
|         | Thyroid Receptor Beta effect                | inactive | good     |
| DOleySM | Estrogen Receptor Relative Binding Affinity | active   | low      |
|         | Estrogen Receptor-mediated effect           | inactive | good     |
|         | Androgen Receptor-mediated effect           | inactive | moderate |
|         | Thyroid Receptor Alpha effect               | inactive | good     |
|         | Thyroid Receptor Beta effect                | inactive | good     |
| DCSM    | Estrogen Receptor Relative Binding Affinity | active   | low      |
|         | Estrogen Receptor-mediated effect           | inactive | good     |
|         | Androgen Receptor-mediated effect           | inactive | moderate |
|         | Thyroid Receptor Alpha effect               | inactive | good     |
|         | Thyroid Receptor Beta effect                | inactive | good     |
| DLSM    | Estrogen Receptor Relative Binding Affinity | active   | low      |
|         | Estrogen Receptor-mediated effect           | inactive | good     |
|         | Androgen Receptor-mediated effect           | inactive | moderate |
|         | Thyroid Receptor Alpha effect               | inactive | good     |
|         | Thyroid Receptor Beta effect                | inactive | good     |
| DGSM    | Estrogen Receptor Relative Binding Affinity | active   | low      |
|         | Estrogen Receptor-mediated effect           | inactive | moderate |
|         | Androgen Receptor-mediated effect           | inactive | moderate |
|         | Thyroid Receptor Alpha effect               | inactive | good     |
|         | Thyroid Receptor Beta effect                | inactive | good     |
| DFSM    | Estrogen Receptor Relative Binding Affinity | active   | low      |
|         | Estrogen Receptor-mediated effect           | inactive | good     |
|         | Androgen Receptor-mediated effect           | inactive | moderate |
|         | Thyroid Receptor Alpha effect               | inactive | good     |
|         | Thyroid Receptor Beta effect                | inactive | good     |

Table S5. Predicted oral LD<sub>50</sub> and NOAEL in rats.

| Substance | LD <sub>50</sub> (mg/kg bw) | NOAEL (mg/kg bw per day) |
|-----------|-----------------------------|--------------------------|
| SM        | 3380                        | 580                      |
| DESM      | 2904                        | 199                      |
| DBSM      | 4841                        | 245                      |
| DOSM      | 8953                        | 372                      |
| DOleySM   | NA                          | 1050                     |
| DCSM      | 9213                        | 331                      |
| DLSM      | 12538                       | 563                      |
| DGSM      | 1575                        | 314                      |
| DFSM      | 580                         | 438                      |
| DO2HS     | 14567                       | 359                      |
| SAL       | 1982                        | 67                       |

NA: not applicable

Table S6: Predictions on the bioaccumulation property using VEGA and ISIDA Predictor platforms.

| Substance | Log BCF computational model | Prediction | Reliability |
|-----------|-----------------------------|------------|-------------|
| SM        | CAESAR                      | 0.22       | low         |
|           | Meylan                      | 0.50       | low         |
|           | KNN/Read-across             | 0.84       | moderate    |
|           | Arnot-Gobas                 | -0.02      | low         |
|           | ISIDA                       | 0.13       | good        |
| DESM      | CAESAR                      | 0.27       | low         |
|           | Meylan                      | 1.33       | low         |
|           | KNN/Read-across             | 1.43       | low         |
|           | Arnot-Gobas                 | 0.02       | low         |
|           | ISIDA                       | 0.64       | good        |
| DBSM      | CAESAR                      | 0.13       | low         |
|           | Meylan                      | 1.25       | low         |
|           | KNN/Read-across             | 1.35       | low         |
|           | Arnot-Gobas                 | 0.25       | low         |
|           | ISIDA                       | 1.03       | good        |
| DOSM      | CAESAR                      | 0.27       | low         |
|           | Meylan                      | 2.84       | low         |
|           | KNN/Read-across             | 0.96       | low         |
|           | Arnot-Gobas                 | 0.04       | low         |
|           | ISIDA                       | 1.06       | good        |
| DOleySM   | CAESAR                      | -0.05      | low         |
|           | Meylan                      | 0.50       | low         |
|           | KNN/Read-across             | 2.25       | low         |
|           | Arnot-Gobas                 | -0.05      | low         |
|           | ISIDA                       | 1.53       | good        |
| DCSM      | CAESAR                      | 0.10       | low         |
|           | Meylan                      | 2.46       | low         |
|           | KNN/Read-across             | 0.98       | low         |
|           | Arnot-Gobas                 | -0.02      | low         |
|           | ISIDA                       | 1.17       | good        |
| DLSM      | CAESAR                      | 0.22       | low         |
|           | Meylan                      | 1.51       | low         |
|           | KNN/Read-across             | 1.33       | low         |
|           | Arnot-Gobas                 | -0.05      | low         |
|           | ISIDA                       | 1.15       | good        |
| DGSM      | CAESAR                      | -0.18      | low         |
|           | Meylan                      | 3.10       | low         |
|           | KNN/Read-across             | 1.76       | low         |
|           | Arnot-Gobas                 | 2.02       | low         |
|           | ISIDA                       | 1.30       | good        |
| DFSM      | CAESAR                      | -0.02      | low         |
|           | Meylan                      | 0.53       | low         |
|           | KNN/Read-across             | 1.47       | low         |
|           | Arnot-Gobas                 | -0.05      | low         |
|           | ISIDA                       | 1.54       | good        |

Table S7. Predictions on the biodegradability property using VEGA and ISIDA Predictor platforms.

| Substance | VEGA          | ISIDA         |
|-----------|---------------|---------------|
| SM        | RB (moderate) | nRB (low)     |
| DESM      | RB (moderate) | nRB (low)     |
| DBSM      | RB (moderate) | nRB (good)    |
| DOSM      | RB (moderate) | nRB (good)    |
| DOleySM   | RB (moderate) | nRB (good)    |
| DCSM      | RB (moderate) | nRB (good)    |
| DLSM      | RB (moderate) | nRB (good)    |
| DGSM      | RB (low)      | nRB (average) |
| DFSM      | RB (moderate) | nRB (good)    |

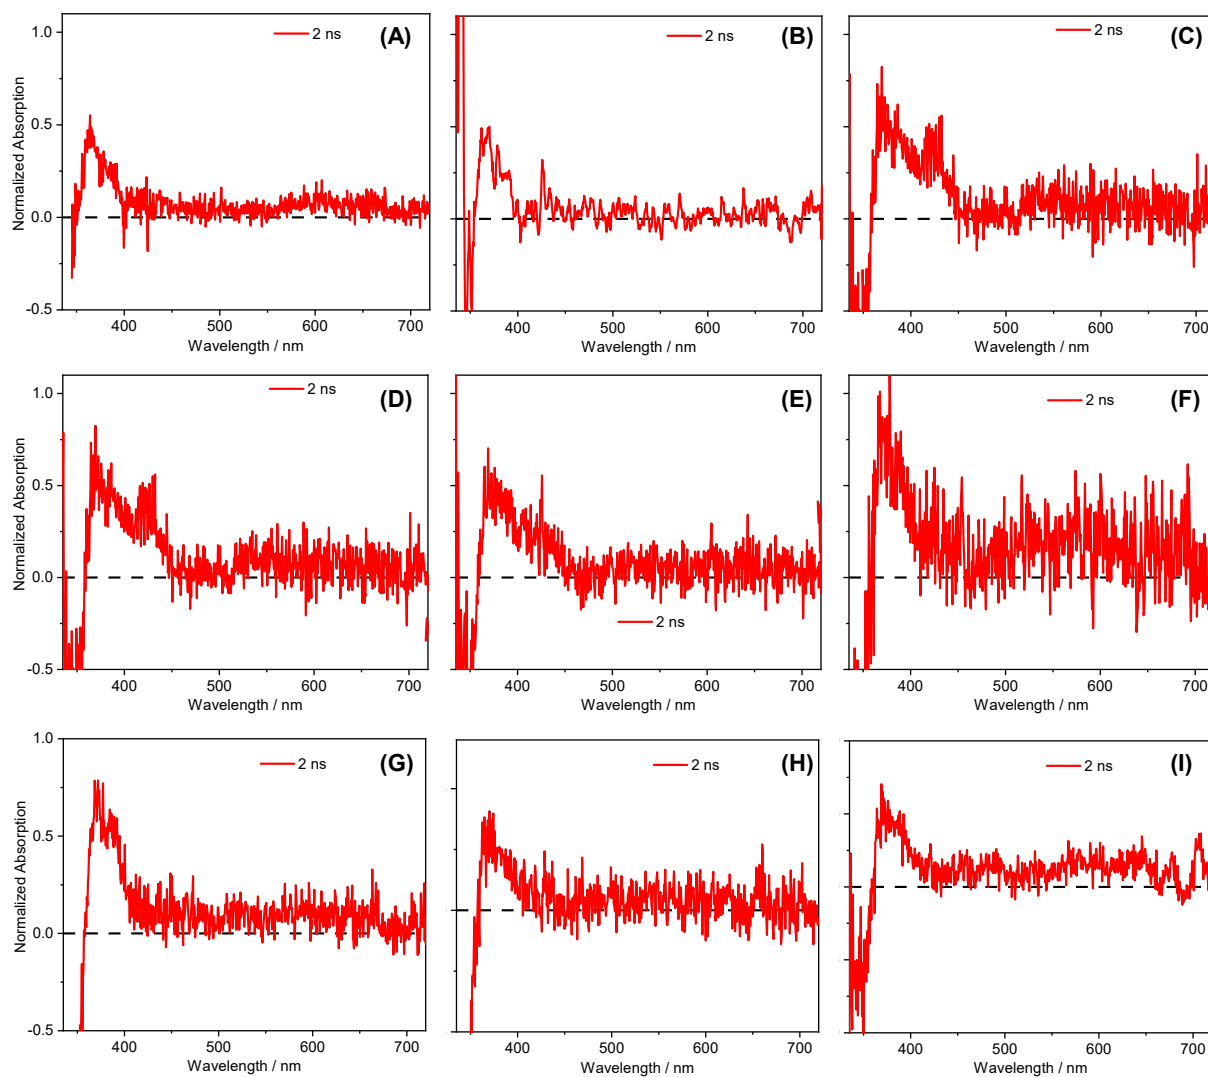

## 2 ns transient spectral of Sinapoyl-L-Malate and its derivatives

Figure S46: 2 ns transient data obtained in caprylic capric triglyceride for (A) SM, (B) DESM, (C) DBSM (D) DOSM, (E) DLSM, (F) DCSM, (G) DGSM, (H) DFSM, and (I) DOleySM

## Evolution associated difference spectra (EADS) obtained from the global fitting of transient

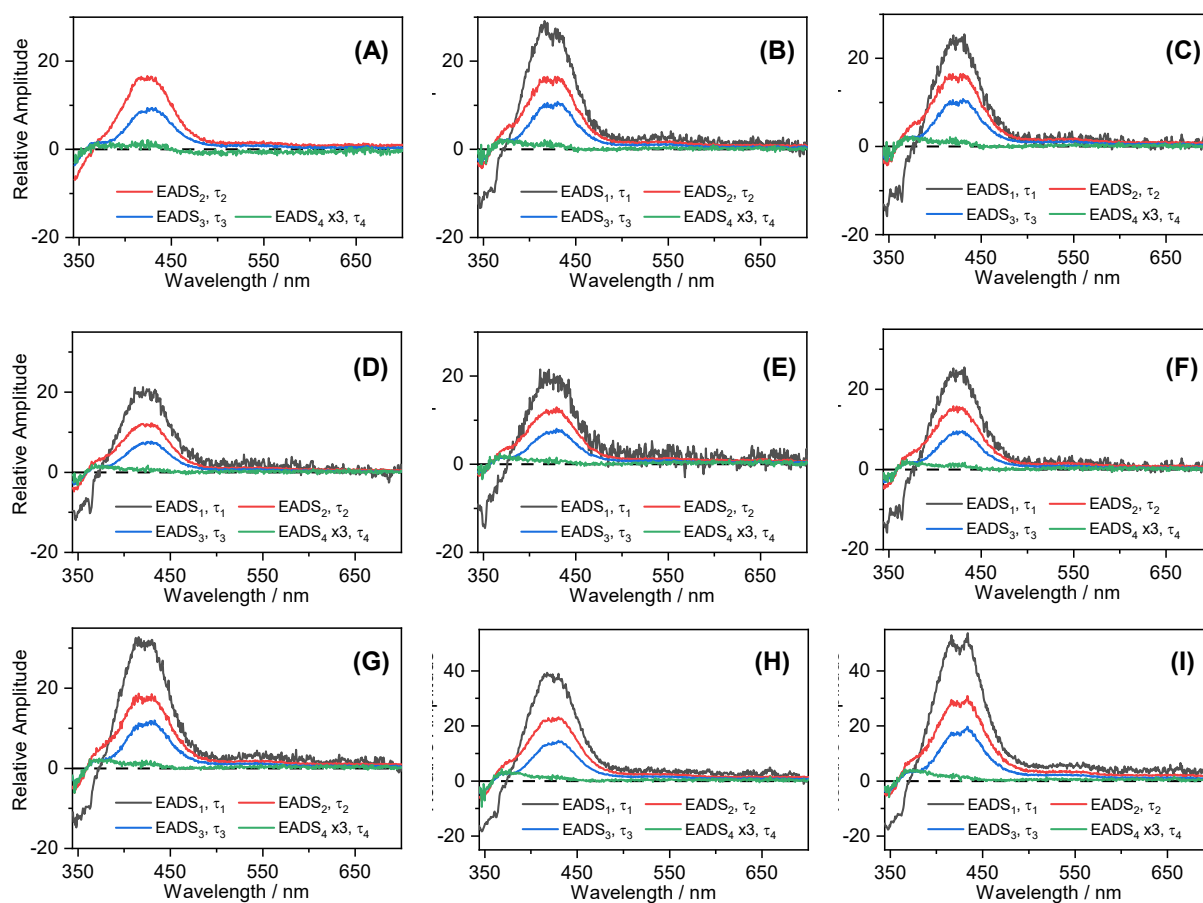

### data for sinapoyl-L-malate and its derivatives

Figure S47: EADS extracted from the sequential global fitting of the transient spectra for (A) SM, (B) DESM, (C) DBSM (D) DOSM, (E) DLSM, (F) DCSM, (G) DGSM, (H) DFSM, and (I) DOleySM. In panel (A) EADS1 have been omitted due to the large error associated with it.



## Residuals from the global fitting of transient data for sinapoyl-L-malate and its derivatives

The residuals from the sequential global fitting with respect to the raw transient electronic absorption (TEA) spectra data (*i.e.*, the difference between the fit and the raw data at each data point) are shown in Figure S46. The small-signal intensities of the residual compared to the raw TEA spectra shown in the main manuscript

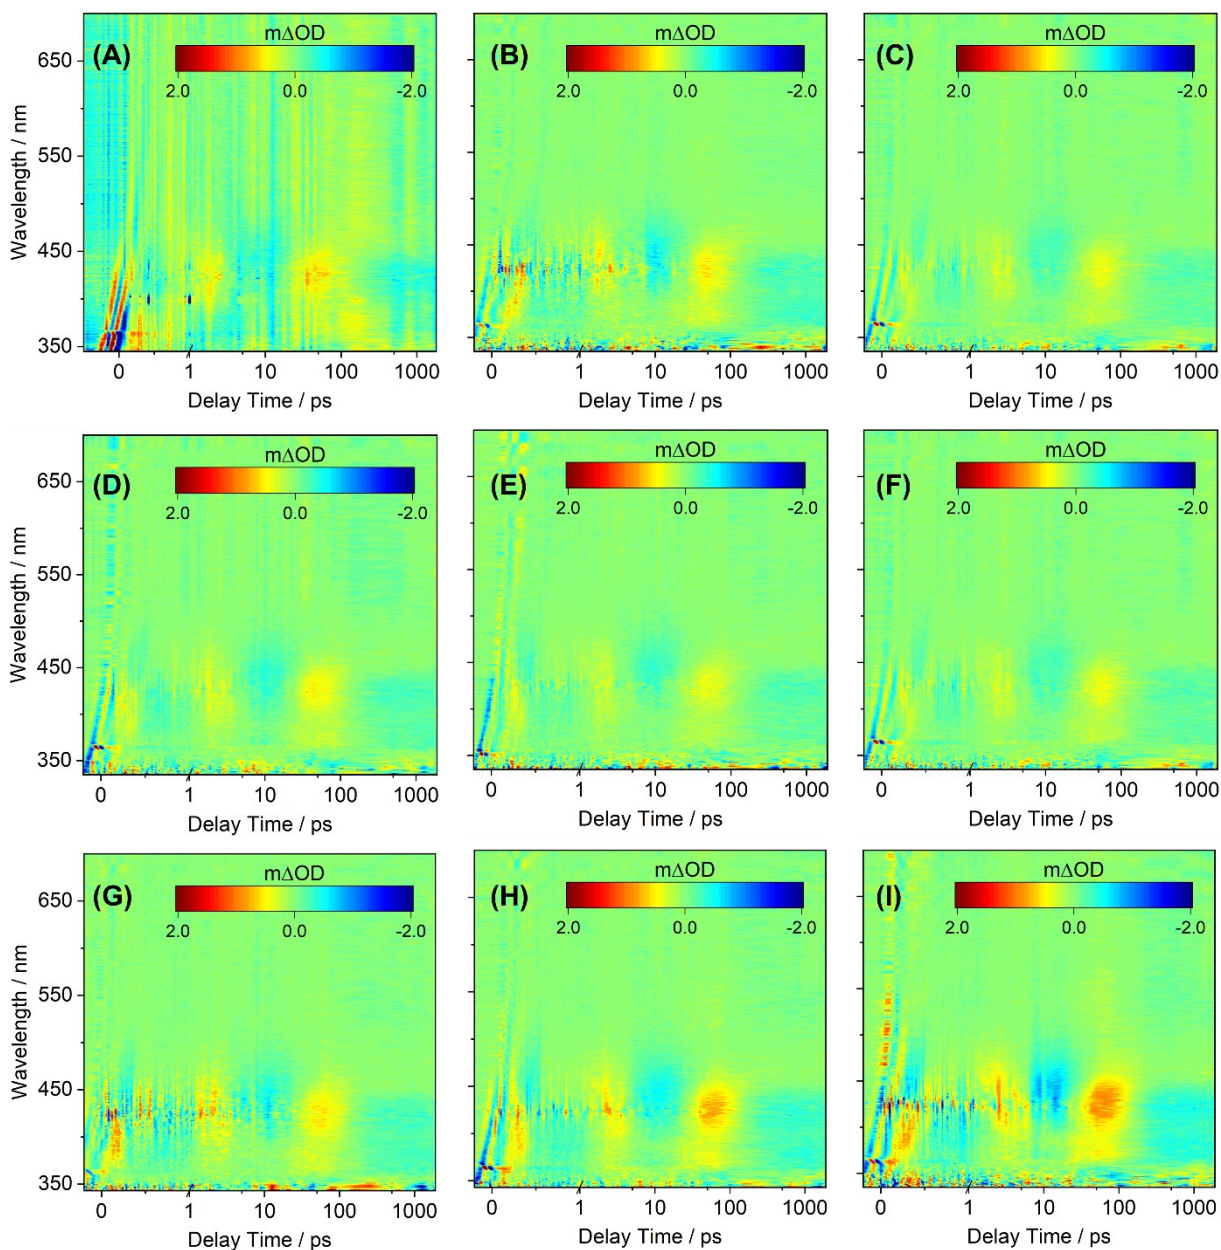

(Figure 4) demonstrate the quality of the fits.

Figure S48: False colour heatmap for the residuals obtained from the sequential global fitting of the transient spectra for (A) SM, (B) DESM, (C) DBSM (D) DOSM, (E) DLSM, (F) DCSM, (G) DGSM, (H) DFSM, and (I) DoleySM.

## Solvent alone instrument response

The TEAS measurements of the time zero solvent-only scan were recorded to obtain the instrument response function (IRF), which determines the limiting temporal resolution of the present transient experiments. The instrument response function in CCT photoexcited at 330 nm (Figure S47 (A)) has a strong contribution of cross-phase modulation between pump and probe pulses as they traverse our solvent medium. However, this should not affect the conclusions of the manuscript given the timescales we are investigating in the solute. For this reason, we chose to follow the approach of Kovalenko *et al.*<sup>1</sup>, in which we use a frequency-dependent cross-correlation function to model the IRF in Figure S47 (B). The value obtained for the temporal resolution of

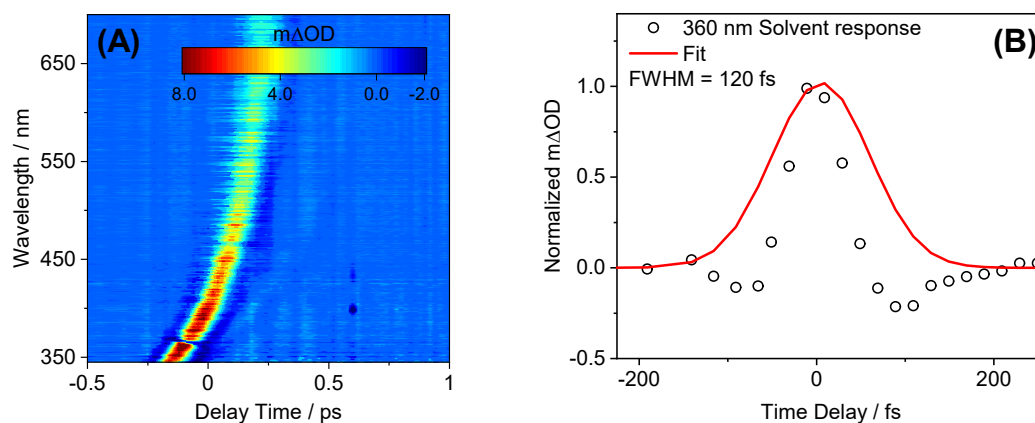

the solvent-only time zero response is 120 fs.

Figure S49: (A) False colour heatmap for CCT solvent only response. (B) Selected transients for solvent-only time-zero response at a probe wavelength of 360 nm with extracted full-width half maxima (FWHM) of 120 fs. This value is used as the instrument response in the global fit analysis of all the TEA spectra.

## Reference

- 1 Kovalenko, S. A., Dobryakov, A. L., Ruthmann, J. & Ernsting, N. P. Femtosecond spectroscopy of condensed phases with chirped supercontinuum probing. *Physical Review A* **59**, 2369-2384, doi:<https://doi.org/10.1103/PhysRevA.59.2369> (1999).
